## Discovery of a SARS-CoV-2 Broadly-Acting Neutralizing Antibody with Activity against Omicron and Omicron + R346K Variants

1 J. Andrew Duty<sup>2,3\*</sup>, Thomas Kraus<sup>2,3\*</sup>, Heyue Zhou<sup>1\*</sup>, Yanliang Zhang<sup>1\*</sup>, Namir Shaabani<sup>1</sup>, Soner Yildiz<sup>2,5</sup>,  
2 Na Du<sup>1</sup>, Alok Singh<sup>1</sup>, Lisa Miorin<sup>2,5</sup>, Donghui Li<sup>1</sup>, Karen Stegman<sup>1</sup>, Sabrina Ophir<sup>2</sup>, Xia Cao<sup>1</sup>, Kristina  
3 Atanasoff<sup>2,6</sup>, Reyna Lim<sup>1</sup>, Shreyas Kowdle<sup>2</sup>, Juan Manuel Carreño<sup>2</sup>, Laura Rivero-Nava<sup>1</sup>, Ariel Raskin<sup>2</sup>,  
4 Elena Moreno<sup>2</sup>, Sachi Johnson<sup>1</sup>, Raveen Rathnasinghe<sup>2,6</sup>, Chin I Pai<sup>1</sup>, Thomas Kehrer<sup>2,6</sup>, Elizabeth Paz  
5 Cabral<sup>1</sup>, Sonia Jangra<sup>2</sup>, Laura Healy<sup>1</sup>, Gagandeep Singh<sup>2</sup>, Prajakta Warang<sup>2</sup>, Viviana Simon<sup>2,5,7,10</sup>, Mia  
6 Emilia Sordillo<sup>10</sup>, Harm van Bakel<sup>11</sup>, Yonghong Liu<sup>2</sup>, Weina Sun<sup>2</sup>, Lisa Kerwin<sup>1</sup>, Peter Palese<sup>2,7</sup>, John  
7 Teijaro<sup>4</sup>, Michael Schotsaert<sup>2,5</sup>, Florian Krammer<sup>2,8</sup>, Damien Bresson<sup>1</sup>, Adolfo García-Sastre<sup>2,5,7,8,9</sup>, Yanwen  
8 Fu<sup>1</sup>, Benhur Lee<sup>2</sup>, Colin Powers<sup>1</sup>, Thomas Moran<sup>2,3</sup>, Henry Ji<sup>1#</sup>, Domenico Tortorella<sup>2,3</sup>, Robert Allen<sup>1</sup>

### 9 **Affiliations:**

10 <sup>1</sup>Sorrento Therapeutics, Inc., San Diego, CA 92121

11 <sup>2</sup> Department of Microbiology,  
12 Icahn School of Medicine, Mount Sinai, New York, NY

13 <sup>3</sup> Center for Therapeutic Antibody Development, Drug Discovery Institute, Icahn School of Medicine,  
14 Mount Sinai, New York, NY

15

16 <sup>4</sup> Department of Immunology and Microbial Science, The Scripps Research Institute, La Jolla, CA 92037

17 <sup>5</sup> Global Health and Emerging Pathogens Institute, Icahn School of Medicine, Mount Sinai, New York, NY

18

19 <sup>6</sup> Graduate School of Biomedical Sciences, Icahn School of Medicine at Mount Sinai, New York, NY

20

21 <sup>7</sup> Department of Medicine, Division of Infectious Diseases, Icahn School of Medicine at Mount Sinai, New  
22 York, NY

23

24 <sup>8</sup> Department of Pathology, Molecular and Cell-Based Medicine, Icahn School of Medicine at Mount  
25 Sinai, New York, NY

26

27 <sup>9</sup> The Tisch Cancer Institute, Icahn School of Medicine, Mount Sinai, New York, NY

28

29 <sup>10</sup> Department of Pathology, Molecular and Cell based Medicine, Icahn School of Medicine, Mount Sinai,  
30 New York, NY

31

32 <sup>11</sup> Department of Genetics and Genomic Sciences, Icahn School of Medicine, Mount Sinai, New York, NY

33

34

35 \* these authors contributed equally to the work

36 # Address Correspondence to Henry Ji ([hji@sorrentotherapeutics.com](mailto:hji@sorrentotherapeutics.com), 4955 Directors Place, San Diego,  
37 CA, 92121



39 **ABSTRACT**

40 **The continual emergence of SARS-CoV-2 variants of concern, in particular the newly emerged**  
41 **Omicron (B.1.1.529) variant, has rendered ineffective a number of previously EUA approved**  
42 **SARS-CoV-2 neutralizing antibody therapies. Furthermore, even those approved antibodies**  
43 **with neutralizing activity against Omicron are reportedly ineffective against the subset of**  
44 **Omicron variants that contain a R346K substitution, demonstrating the continued need for**  
45 **discovery and characterization of candidate therapeutic antibodies with the breadth and**  
46 **potency of neutralizing activity required to treat newly diagnosed COVID-19 linked to recently**  
47 **emerged variants of concern. Following a campaign of antibody discovery based on the**  
48 **vaccination of Harbour H2L2 mice with defined SARS-CoV-2 spike domains, we have**  
49 **characterized the activity of a large collection of Spike-binding antibodies and identified a**  
50 **lead neutralizing human IgG1 LALA antibody, STI-9167. STI-9167 has potent, broad-spectrum**  
51 **neutralizing activity against the current SARS-COV-2 variants of concern and retained activity**  
52 **against the Omicron and Omicron + R346K variants in both pseudotype and live virus**  
53 **neutralization assays. Furthermore, STI-9167 nAb administered intranasally or intravenously**  
54 **provided protection against weight loss and reduced virus lung titers to levels below the limit**  
55 **of quantitation in Omicron-infected K18-hACE2 transgenic mice. With this established activity**  
56 **profile, a cGMP cell line has been developed and used to produce cGMP drug product**  
57 **intended for use in human clinical trials.**

58

## 59 INTRODUCTION

60 The severe acute respiratory disease syndrome coronavirus 2 (SARS-CoV-2) pandemic has  
61 continued to significantly impact the health and lives of people around the globe <sup>1</sup>. To date,  
62 public health agencies have sought to combat infections leading to COVID-19 by relying on  
63 quarantine, social distancing, vaccination, and antiviral countermeasure strategies <sup>2,3</sup>. Despite  
64 these efforts, the continued spread of SARS-CoV-2 has led to the emergence of several variants  
65 of concern (VOCs) that have risen in prevalence worldwide <sup>2-7</sup>.

66 Each VOC encodes multiple changes in the amino acid sequence of the SARS-CoV-2 spike that  
67 can impact the neutralizing properties of manufactured SARS-CoV-2 neutralizing antibodies  
68 (nAbs) as well as nAbs elicited following vaccination or during the course of natural infection.  
69 Specifically, the Omicron VOC (B.1.1.529) live virus, when profiled in vitro using Vero cells  
70 expressing human ACE2 and human TMPRSS2 for susceptibility to nAbs currently authorized or  
71 approved for clinical use (AFCU nAbs), has been shown to be resistant to the neutralizing  
72 activities of REGN10987 (imdevimab), REGN10933 (casirivimab), LY-CoV555 (bamlanivimab), LY-  
73 CoV016 (etesevimab), and CT-P59 (regdanvimab), at nAb concentrations  $\leq 10 \mu\text{g/mL}$  ( $\text{IC}_{50}$ ), and  
74 remained susceptible to nAbs COV2-2130 (cilgavimab) and COV2-2196 (tixagevimab) tested as  
75 single nAb therapies or in combination ( $\text{IC}_{50}$  of 43, 126, and 181 ng/mL, respectively) <sup>8-13</sup>. In live  
76 virus neutralization assays utilizing Vero cells overexpressing human TMPRSS2, S309  
77 (sotrovimab) registered an  $\text{IC}_{50}$  of 373 ng/mL, consistent with previously published activity in  
78 Omicron pseudovirus assays for this antibody.

79 A subset (approximately 23% of Omicron sequences in GISAID recorded on outbreak.info) of  
80 Omicron viruses encode an additional mutation in the SARS-CoV-2 spike at position R346K in  
81 the receptor binding domain (RBD) of the protein <sup>14-16</sup>. The R346K mutation was previously  
82 identified among the defining mutations of the SARS-CoV-2 Mu VOC <sup>7</sup>. Using Omicron + R346K  
83 pseudoviruses, neutralization potency was reported as substantially reduced for all tested AFCU  
84 nAbs, including COV2-2130, COV2-2196, and S309 <sup>5,17-20</sup>. Current antibodies in development,  
85 including bebtelovimab and BR11-198 (romlusevimab), maintain activity in Omicron pseudotype  
86 neutralization assays <sup>12,21</sup>. BR11-198 displays substantially reduced neutralizing activity in assays  
87 using Omicron + R346K pseudoviruses while testing of bebtelovimab against the Omicron +  
88 R346K variant has not yet been reported <sup>12,21</sup>. As such, there is a continued need for discovery  
89 and development of nAbs that can provide potent immune protection against COVID-19 caused  
90 by pandemic VOCs presently infecting the global population.

91 In the early COVID-19 disease setting, intravenous (IV) administration of nAbs is an effective  
92 means of lessening progression and overall severity of disease <sup>18,22</sup>. As COVID-19 is a  
93 predominantly respiratory disease, exploration of alternative modes of antibody administration  
94 including intranasal (IN) delivery may provide an expedient means of delivering antibodies and  
95 increasing the respiratory tract bioavailability of anti-COVID-19 nAbs as well as augmenting the  
96 developing host-directed immune response to prevent exacerbation of clinical symptoms and  
97 hospitalization <sup>23-25</sup>.

98 Data presented herein demonstrate the identification, *in vitro* binding, and potent neutralizing  
99 activity of STI-9167 against live viruses and pseudotype viruses representing the current catalog  
100 of SARS-CoV-2 variants, including the Omicron and Omicron +R346K variant. Additionally, we

101 describe the protective effects of STI-9167 administered IV or IN in the K18ACE2 transgenic  
102 mouse model of COVID-19 disease following challenge with either the WA-1 strain, Delta, or  
103 Omicron VOC.

## 104 **RESULTS**

### 105 Generation of human anti-SARS-CoV-2 spike antibodies

106 To generate a panel of neutralizing human monoclonal antibodies against SARS-CoV-2, Harbour  
107 *H2L2*<sup>®</sup> mice were immunized and boosted with a receptor binding domain (RBD) fusion protein  
108 based on the original spike glycoprotein sequence from the Wuhan seafood market pneumonia  
109 virus isolate (GenBank Accession# MN908947) which was fused to a mouse Fc domain (**Figure**  
110 **1A**). The sera from immunized mice were assessed for binding to 293ExpiF cells transfected  
111 with SARS-CoV-2 spike cDNA (original Wuhan strain) using high-throughput flow cytometry  
112 (**Figure 1B**). We observed that the serum from Mouse 1, 3, and 4 demonstrated a concentration  
113 dependent and specific binding to 293ExpiF cells expressing SARS-CoV-2 spike. Given that  
114 Mouse 3 and Mouse 4 had the highest titer humoral response against SARS-CoV-2 spike, the  
115 spleens from these animals were used to generate hybridoma clones <sup>26</sup>. The hybridoma clones  
116 (1,824 clones from Mouse 3 and 1,440 clones from Mouse 4) were screened for binding to  
117 293ExpiF cells expressing SARS-CoV-2 spike by flow cytometry and RBD-spike (Wuhan) (**Figure**  
118 **1**). A representative heat map for Mouse 4 fusion was generated to summarize the mean  
119 fluorescence intensity (MFI) for each hybridoma clone (**Figure 1C**). In parallel, hybridoma clones  
120 were subjected to an RBD ELISA validating the clones that bound to SARS-CoV-2 spike. We  
121 identified 188 clones with a >5-fold MFI over untransfected cells and classified these as

122 candidate SARS-CoV-2 binding antibodies. The supernatants from these clones were then  
123 evaluated in a high-throughput neutralization assay using the replication competent VsV  
124 reporter virus that utilizes SARS-CoV-2 spike (VsV<sup>CoV2-spike</sup>) as its envelope protein and  
125 expressing GFP as readout for infection <sup>27</sup> (**Figure 1C**, Secondary Screening). Briefly, VsV<sup>CoV2-spike</sup>  
126 was preincubated with hybridoma supernatant (1:20) followed by infection of HEK-293 cells  
127 expressing TMPRSS2 for 24hrs and analyzed for GFP positive cells using flow cytometry. The %  
128 infection was determined by assigning 100% infection with VsV<sup>CoV2-spike</sup> pre-incubated with  
129 hybridoma media alone. Thirty-eight clones that decreased infection >50% were selected for  
130 further evaluation for neutralization by determining the IC<sub>50</sub> values. For the hybridomas from  
131 the Mouse 3 fusion, 340 clones were found to bind to SARS-CoV-2 spike and 90 clones were  
132 found to have neutralization activity against VsV<sup>CoV2-spike</sup>. The selected neutralizing clones with  
133 IC<sub>50</sub> values <125pM were then examined for IgG isotypes and expanded for further analysis.  
134 Sequencing of the heavy chain from each hybridoma clone revealed diverse CDR3 lengths  
135 ranging from 10-20 aa in length (**Figure 1D**). Clones that were identical copies of each other  
136 were consolidated to a single candidate.

137 To identify the most effective human anti-SARS-CoV-2 spike neutralizing antibodies, we  
138 performed a VsV<sup>CoV2-spike</sup> neutralization assay (**Figure 1D**). Briefly, VsV<sup>CoV2-spike</sup> preincubated with  
139 increasing concentrations of antibody (0-5mg/mL) was added to TMPRSS2-expressing HEK-293  
140 cells and analyzed for GFP positive cells using flow cytometry.

141 VsV<sup>CoV2-spike</sup> preincubated with a control antibody was used as 100% infection. The various  
142 unique antibodies have a range of IC<sub>50</sub> values from 5-1,000pM across the different antibody  
143 families. Collectively, we have identified a panel of unique human antibodies that bind to SARS-

144 CoV-2 and effectively neutralize a reporter virus that utilizes the SARS-CoV-2 spike for entry into  
145 human cells.

146 Candidate nAbs sequences were formatted as full-length human IgG1 antibodies and expressed  
147 in Chinese hamster ovary (CHO) cells for further characterization in vitro. It has been shown in  
148 the context of multiple virus infections that virus-specific antibodies can lead to exacerbation of  
149 disease symptoms through a process termed antibody dependent enhancement (ADE) <sup>28,29</sup>. To  
150 reduce the risk of ADE resulting from administration of our lead candidate STI-9167, the IgG1 Fc  
151 regions were modified by introducing specific amino acid substitutions (L234A, L235A [LALA])  
152 <sup>30,31</sup>. The LALA Fc modification reduces binding affinity to the Fc $\gamma$  receptors while providing a  
153 similar blockade to interactions between SARS-COV-2 and the angiotensin-converting enzyme 2  
154 (ACE2) receptor expressed on susceptible cells in the lung and other organs <sup>32-34</sup>.

155 To determine the effects of variant specific spike S1 domain mutations within and outside the  
156 RBD region of S1 on antibody binding, the affinity of STI-9167 and EUA-approved SARS-CoV-2  
157 nAbs sotrovimab, cilgavimab, and tixagevimab were determined for monomeric WA-1 spike S1  
158 subunit binding as well as VOC-derived S1 domains using surface plasmon resonance (SPR). Of  
159 note, the  $k_D$  of STI-9167 was measured as 6.20 nM for the WA-1 isolate, 4.45 nM for the Delta  
160 variant, and 22.6 nM for the Omicron variant. Binding kinetics for the Omicron variant were  
161 compared between STI-9167, sotrovimab, cilgavimab, and tixagevimab. (**Figure 2A, Table 1A**  
162 **and Supplemental Figure 4**). STI-9167 and cilgavimab had a similar association rate and  
163 sotrovimab was approximately 5-fold slower. The dissociation rate was slowest with sotrovimab  
164 by a factor of approximately 10-fold as compared to STI-9167, and STI-9167 dissociated at an



165 approximately 2-fold slower rate than cilgavimab. Tixagevimab binding to Omicron S1 domain  
166 monomer was insufficient to allow for quantitation.

167 In an effort to assess nAb binding to spike proteins in a native conformation, STI-9167 was  
168 tested for the binding of full-length spike protein expressed on the surface of transfected  
169 HEK293 cells. Cell-based binding studies demonstrated STI-9167 binds with similar efficiency to  
170 surface-expressed spike from the WA-1 isolate ( $EC_{50}=0.025 \mu\text{g/mL}$ ), Delta variant ( $EC_{50}=0.011$   
171  $\mu\text{g/mL}$ ), and the Omicron variant ( $EC_{50}=0.024 \mu\text{g/mL}$ ), as well as the greater catalog of VOC  
172 spike protein (**Figure 2B and Supplemental Figure 1**). In general, the rank-order of binding  
173 efficiencies to surface-expressed spike for those nAbs considered in the SPR studies followed  
174 the same pattern as that determined for spike monomer binding, with the greatest  
175 concordance in binding efficiency seen between STI-9167 and cilgavimab (**Table 1B and**  
176 **Supplemental Figure 5**). Of note, half-maximal binding of STI-9167 to the Omicron + R346K  
177 spike ( $EC_{50}=0.023 \mu\text{g/mL}$ ) was equivalent to that measured for Omicron, suggesting that the  
178 epitope recognized by STI-9167 is preserved in the context of Omicron + R346K as compared to  
179 epitopes engaged by cilgavimab, which displayed reductions in Omicron + R346K spike binding  
180 of over 60-fold as compared to  $EC_{50}$  values in assays targeting Omicron spike. Based on the  
181 spike S1 and full-length spike protein binding data, STI-9167 was further profiled to determine  
182 the potency of virus neutralization and the breadth of neutralizing protection this antibody  
183 provided against SARS-CoV-2 variants of concern in vitro.

184 Virus pseudotypes were used to determine the neutralization potency ( $IC_{50}$ ) of STI-9167 against  
185 an index virus generated with a spike protein that carries a single D614G (VSV<sup>D614G-spike</sup>)  
186 mutation as compared to the WA-1 spike protein <sup>35</sup>. To approximate conditions found in the

187 setting of human SARS-CoV-2 infection, pseudovirus assays were carried out using HEK293 cells  
188 which overexpressed human ACE2 and TMPRSS2 proteins. The average IC<sub>50</sub> value for STI-9167  
189 in assays using the VSV<sup>D614G-spike</sup> pseudovirus was 3.6 ng/mL (**Table 1C**). The STI-9167  
190 neutralization potency for VSV<sup>Delta-spike</sup> (IC<sub>50</sub>=5.4 ng/mL), VSV<sup>Omicron-spike</sup> (IC<sub>50</sub>=14.8 ng/mL), and  
191 VSV<sup>Omicron+R346K-spike</sup> (IC<sub>50</sub>=23.9 ng/mL) pseudotypes was maintained to within 7-fold of that  
192 measured in assays with the VSV<sup>D614G-spike</sup> pseudotype (**Figure 2C**). Furthermore, STI-9167  
193 neutralization potency was maintained to the same degree against the full catalog of VOC-  
194 based pseudovirus tested, including Alpha, Beta, Gamma, Delta Plus, Epsilon, Zeta, Iota, Kappa,  
195 Lambda, and Mu VOCs (**Supplemental Data Figure 1**). The concentration of nAbs required to  
196 achieve half-maximal and eighty-percent-maximal levels of neutralization potency for VOC  
197 pseudotypes as well as for the VSV<sup>D614G-spike</sup> pseudotype are detailed in Table 1C.

198 The potency of STI-9167, cilgavimab, and tixagevimab was further characterized in live virus  
199 neutralization assays utilizing Vero cells . Neutralizing activity was determined following  
200 infection with WA-1 strain or Omicron variant and compared to EUA approved antibodies  
201 (**Table 1D and Supplemental Figure 3**). In keeping with the results from pseudovirus assays, we  
202 observed that STI-9167 neutralized all isolates tested including the Delta variant and Omicron  
203 variant at half-maximal concentrations within 9-fold of those measured against live WA-1 virus,  
204 with an IC<sub>50</sub> of 54.29 ng/ml against live Omicron variant virus (**Figure 2D**). Neutralization  
205 potency for Omicron virus in experiments using Vero target cells was 582.5 ng/ml for  
206 cilgavimab, 197.2 ng/ml for tixagevimab, and 393 ng/ml for sotrovimab.

207

208 Bioavailability

209 The biodistribution of STI-9167 was evaluated following delivery by either the intravenous or  
210 intranasal route. These studies illustrate the potential effects of delivery route on the timing of  
211 antibody exposure in the lung tissue and sera of treated mice. Following IV treatment at a dose  
212 level of 0.5 mg/kg, STI-9167 was detected in the serum, spleen, lungs, small intestine, and large  
213 intestine of most animals. Detected levels in the serum following IV dosing at the 0.5 mg/kg  
214 dose averaged 6.2 µg/mL, while STI-9167 was undetected in lung lavage material at each of the  
215 IV doses tested, (**Figure 3A**, upper left panel). Upon processing of lung tissue, antibody was  
216 detected at a mean concentration of 0.4 ng/mg of tissue in the 0.5 mg/kg IV dose group. Lower  
217 IV doses of STI-9167 did not lead to a statistically significant difference in antibody detected in  
218 lung tissue as compared to untreated animals. Antibody levels in the spleen reached an average  
219 concentration of 0.2 ng/mg of tissue within 24 hours of IV dosing at 0.5 mg/kg. Similarly,  
220 antibody was detectable in a majority of both the small and large intestines only at the highest  
221 dose level, with average concentrations of 0.14 and 0.07 ng/mg of tissue, respectively (**Figure**  
222 **3A**, upper right panel).

223 Following intranasal (IN) administration of STI-9167, the concentration of antibody in the serum  
224 at 24 hours reached an average value of 0.054 µg/mL in the 0.5 mg/kg dose group. As  
225 compared to IV treated animals at the 0.5 mg/kg dose, STI-9167 administered IN resulted in a  
226 114-fold lower concentration of antibody in serum at the 24-hour timepoint. In contrast to the  
227 observed reductions in IN serum nAb levels vs. those following IV nAb administration, STI-9167  
228 concentrations in lung lavage samples following IN dosing reached average concentrations of  
229 0.18 µg/mL in the 0.5 mg/kg group, a 9-fold increase over lung lavage nAb levels observed

230 following IV delivery of the 0.5 mg/kg dose, confirming that lung lavage materials can more  
231 efficiently collect drugs delivered through the airway than those delivered IV. In lung tissue  
232 samples 24 hours following the 0.5 mg/kg IN dose, STI-9167 was detected at an average  
233 concentration of 0.173 ng/mg of tissue, similar to those levels recorded in IV-treated animals at  
234 the same dose level. STI-9167 levels in spleen, small and large intestine at all IN dose levels  
235 tested did not rise to concentrations above background (**Figure 3B**).

236 Overall, IN delivery of STI-9167 led to lower serum concentrations, increased lung lavage  
237 concentrations, and similar tissue concentrations in the spleen, lungs, small intestine, and large  
238 intestine when compared to IV delivery. This suggests that IN administration serves to increase  
239 the amount of antibody in the pulmonary lavage material, potentially allowing for more  
240 efficient neutralization of respiratory virus particles present in the extravascular spaces along  
241 the respiratory tract during the initial stages of infection.

#### 242 Pharmacokinetics

243 To characterize STI-9167 pharmacokinetic parameters following intranasal dosing, antibody  
244 levels in CD-1 mouse lung tissue lysates and serum were quantified at designated timepoints  
245 spanning a total of 336 h using a human antibody detection ELISA assay. In this assay the  
246 background concentration was on average 16.8 ng/mL based on measurements obtained using  
247 pre-dose samples. Following IN administration of STI-9167, the antibody concentration was  
248 quantifiable for most of the animals at the 336 h timepoint in both the lungs and serum (**Figure**  
249 **3C**). The  $C_{max}$  value of STI-9167 in the lungs was measured at 1.5 hours ( $T_{max}$ ) post-  
250 administration at a value of 43  $\mu\text{g/mL}$ . In the lungs following IN administration, STI-9167

251 exhibited an apparent terminal half-life ( $T_{1/2}$ ) of 26.6 h. Kinetics of STI-9167 exposure in the  
252 lungs following IN administration contrasted with the slower rate of antibody accumulation in  
253 the serum of treated mice (**Figure 3C**). Antibody was first detected in the serum at 1.5 hours  
254 post-administration and the  $C_{max}$  of 456 ng/mL was reached at the 168 h timepoint ( $T_{max}$ ),  
255 although consideration of the standard deviations in values measured among animals on or  
256 between the 72h and 168h timepoints suggests that the  $T_{max}$  may have occurred as early as 72  
257 hours post-administration. Antibody levels remained relatively constant in serum over the  
258 period spanning 24 - 336 h, which is in keeping with the calculated STI-9167 serum half-life  
259 observed following IV STI-9167 administration in CD-1 mice (data not shown). The total  
260 systemic antibody exposure ( $AUC_{last}$ ) was greater than 5-fold higher in the lungs than in the  
261 serum of IN-treated mice ( $AUC_{last}$  were 594,705 and 105,149 h\*ng/mL respectively).

262 Treatment using IV or IN administered STI-9167 in the K18-hACE2 transgenic mouse model of  
263 COVID-19

264 SARS-CoV-2 pathogenesis in the K18-ACE2 transgenic model of COVID-19 respiratory disease  
265 provides a tractable means of assessing nAb activity in a preclinical model of respiratory disease  
266 [36-38](#). The clinical signs and histological markers of pathogenesis in this model include weight  
267 loss over the first four to five days post-infection and the presence of microscopic lesions in the  
268 infected lungs <sup>37-40</sup>. Peak virus lung titers are typically detected by day 5 post-infection, but the  
269 timing and peak amplitude of replication in the lungs can vary depending on the specific VOC  
270 used to challenge the mice <sup>39</sup>. The breadth of protection provided by STI-9167 was established  
271 by treating mice following virus challenge with  $1 \times 10^5$  half-maximal tissue culture infectious  
272 dose ( $TCID_{50}$ ) of the WA-1 strain, the Delta variant, or the Omicron variant. Animals treated

273 with isotype control antibody lost weight in each experiment, with the average percentage  
274 weight reduced to 91.3 % with WA-1 strain, 89 % with Delta variant, and 94.7 % with Omicron  
275 variant (**Figure 4B, 4E**) as compared to average Day 0 weights in each group. To determine the  
276 effects of the route of administration on the degree of protection conferred by treatment with  
277 STI-9167 at doses ranging from 5 to 20 mg/kg, antibody was administered by either intravenous  
278 injection (**Figure 4A**) or intranasal instillation (**Figure 4D**). At a dose level of 5 mg/kg,  
279 administration of STI-9167 to K18-hACE2 mice by either the IV or IN route provided protection  
280 against weight loss caused by WA-1 strain, Delta variant, and Omicron variant (**Figure 4B, 4E**).  
281 Virus replication in the lungs, quantified on day 4 post-infection, was approximately  $2.5 \times 10^6$ ,  
282  $2.1 \times 10^4$ , and  $4.5 \times 10^2$  TCID<sub>50</sub>/g on average in isotype control-treated mice infected with WA-1,  
283 Delta variant, or Omicron variant, respectively. Following infection by each of the SARS-CoV-2  
284 challenge viruses, lung virus titers in mice treated with STI-9167 were reduced to levels below  
285 the limit of quantification, independent of the nAb dosing route or the nAb dose level (**Figure**  
286 **4C, 4F**).

## 287 **DISCUSSION**

288 Use of antibody discovery platforms that do not require material derived from infected  
289 individuals, such as the vaccination strategy employed here or the screening of established  
290 antibody libraries, can provide a preemptive means of addressing the challenges presented by  
291 pandemic threat pathogens<sup>14,41</sup>. The production of human antibodies in transgenic animals has  
292 several advantages including *in vivo* affinity maturation, increased diversity, and clonal selection  
293 for antibody optimization<sup>42</sup>. Thus, the generation of antibodies to specific protein domains  
294 allows for the development of highly reactive and effective antibody therapeutics.

295 The pool of antibodies we identified following vaccination of mice with an SARS-CoV-2 RBD  
296 protein based on the Wuhan spike protein sequence includes a candidate with potent  
297 neutralizing activity against many SARS-CoV-2 variants of concern that have emerged in the  
298 past two years of the pandemic. Our antibody binding studies and virus neutralization assays  
299 have provided clear evidence of the broad and potent neutralizing activity of STI-9167 toward  
300 those VOCs identified in the early period of the pandemic as well as those VOCs currently  
301 impacting public health, including Delta and Omicron. Following demonstration of neutralizing  
302 activity against the parental Omicron variant, we have extended our activity profiling studies to  
303 include assessment of the Omicron + R346K subvariant, a virus that is currently represented in a  
304 reported 23% of sequences submitted to GISAID <sup>14-16</sup>. The frequency of Omicron virus  
305 sequences containing the R346K substitution has risen steadily since the first reports in  
306 November of 2021 describing detection of the Omicron variant <sup>43-45</sup>. Using virus pseudotypes,  
307 we have demonstrated durable STI-9167 activity against the Omicron +R346K subvariant. In  
308 addition, we described neutralizing activity against the Mu variant, which also encodes the  
309 R346K spike substitution <sup>7</sup>. The Omicron and Mu variants constitute divergent variants of SARS-  
310 CoV-2, and it appears that the R346K substitution is not sufficient in either of these contexts to  
311 provide a means of resistance to the neutralizing effects of STI-9167.

312 Our studies of nAb STI-2020 previously demonstrated the protective efficacy of IN-administered  
313 antibodies in the context of SARS-CoV-2 preclinical models of pathogenesis <sup>46</sup>. Previous work in  
314 preclinical models of respiratory virus pathogenesis support the use of IN-administered IgG and  
315 IgA mAbs in prophylactic and therapeutic dosing regimens <sup>24,47-50</sup>. In the current report, we  
316 described the protective effects of STI-9167 delivered by either the IN or the IV route to animals

317 infected with WA-1 strain, Delta, or Omicron variants. As evidenced in recently reported  
318 preclinical studies of Omicron pathogenesis as well as our experiments, the severity of clinical  
319 signs and the amount of virus replication in the lungs following Omicron infection was reduced  
320 in comparison to that following infection with the WA-1 strain or the Delta variant<sup>51-53</sup>.  
321 Independent of the challenge virus used, at a dose level of 5 mg/kg, IN treatment with STI-9167  
322 in K18 ACE2 transgenic mice 12 hours following infection provided protection against the  
323 weight loss observed in control animals and also reduced virus lung titers to below the level of  
324 quantitation. Phase 1 clinical studies with STI-2099 (plutavimab) have demonstrated the safety  
325 of nAb delivered as formulated liquid drops to the upper airways. A Phase 2 study has  
326 completed enrollment in the US, and additional Phase 2 studies are ongoing in Mexico and the  
327 United Kingdom. Based on the favorable in vivo potency and physicochemical profile of STI-  
328 9167, cGMP drug product has been prepared in preparation for similar anticipated clinical  
329 studies of STI-9167 administered IV or as intranasal drops (STI-9199).

## 330 **MATERIALS AND METHODS**

### 331 Immunizations and Hybridoma Generation

332 To generate human antibodies, Harbour *H2L2*<sup>®</sup> human antibody transgenic mice (Harbour  
333 BioMed, Cambridge, MA) were utilized under a collaboration between the Icahn School of  
334 Medicine at Mount Sinai and Harbour BioMed. The H2L2 transgenic mouse is a chimeric  
335 transgenic mouse containing the human variable gene segment loci of the heavy and kappa  
336 antibody chains along with the rat heavy and kappa constant gene segment loci, producing a  
337 mouse with normal B cell homeostasis and effector functions, while also producing antibodies



338 that represent the typical diversity observed in human antibody immunity<sup>54</sup>. Immunizations  
339 were done on eight- to twelve-week-old H2L2 mice interperitoneally with 50-100 µg of a  
340 recombinant SARS-CoV2 Spike RBD<sub>319-591</sub>-Fc fusion protein generated from sequence from the  
341 original Wuhan seafood market pneumonia virus isolate (GenBank Accession# MN908947) and  
342 cloned in-frame into pcDNA vectors containing human IgG1 and mouse IgG2a Fc tags (GenScript  
343 USA Inc., Piscataway, NJ). Each mouse received a prime followed by 2 boosts, and blood was  
344 collected from the submandibular vein two weeks after each boost to monitor titer of sera  
345 antibodies. Following sera binding and neutralization analysis, two mice were selected for  
346 hybridoma fusion and received two final boosts consisting of 50-100 µg of the RBD protein at -  
347 5 and -2 days before being euthanized by IACUC approved methods with spleens harvested and  
348 a final bleeding collected for sera analysis (“fusion sera”). The spleens were processed to single  
349 cell suspension and hybridomas were generated using the standard protocol. Briefly, individual  
350 B cell clones were grown on soft agar and selected for screening using a robotic ClonaCell Easy  
351 Pick instrument (Hamilton/Stem Cell Technology). Individual clones were expanded, and the  
352 supernatants were used to screen for binding, neutralization and ACE2 competition assays. All  
353 animal studies were approved by the Icahn School of Medicine Institutional Animal Care and  
354 Use Committee (IACUC).

355 Hybridoma Screening: Expi293F cells were transiently transfected to express SARS-CoV-2 spike  
356 (Wuhan) using Lipofectamine 3000 (L3000001, Thermo Fisher) and then incubated with  
357 supernatant from the hybridoma cell lines from each fusion. Binding was detected using an  
358 anti-rat IgG-APC detection antibody and samples were run on a high-throughput flow  
359 cytometer (Intellicyte High Throughput Flow Cytometer [Intellicyte Corp., Albuquerque, NM]).

360 Samples were compared to controls of fusion sera, unimmunized “normal” mouse sera, and an  
361 in-house generated anti-SARS1&2 Spike mouse monoclonal 2B3E5 at 1 µg/mL. Cells with a high  
362 mean fluorescence intensity (MFI) were identified using FlowJo software (Tree Star, Inc.) and  
363 graphed using GraphPad Prism to create a heat map based on mean fluorescence intensity.

364 ELISA: Immulon 4 HBX high binding clear flat bottom 96 well plates (ThermoFisher) were coated  
365 with SARS-CoV2 Spike RBD<sub>319-591</sub>-Fc fusion at 5 µg/ml in 1xPBS overnight at 4 °C followed by  
366 washing. Washing with 1xPBS was done between each step in triplicate using a Biotek ELX405  
367 MultiPlate Washer (Biotek, Winooski, VT). Plates were blocked for two hours in blocking  
368 solution (1xPBS, 0.5% BSA). Supernatants from the hybridomas were then added and allowed  
369 to incubate for one hour at room temperature followed by the addition of goat anti-rat IgG  
370 (heavy chain specific)-HRP (Jackson ImmunoResearch) at a 1:5,000 dilution in blocking solution  
371 for one hour. ABTS substrate solution (ThermoFisher) was added and allowed to incubate for 5-  
372 10 minutes at room temperature, protected from light. Absorbance at 450nm was measured  
373 using a Biotek Synergy HT Microplate Reader. Fusion sera, normal mouse sera, and 2B3E5 mAb  
374 (0.5-1 µg/ml) were used as controls.

375 Neutralization: Prior to neutralization, hybridoma supernatants grown in SFM (sera free  
376 hybridoma media) (Invitrogen) were quantitated using an Octet Red96 by diluting supernatants  
377 1:5 and 1:10 in sera free media and measured for binding against the Anti-Murine IgG  
378 Quantitation (AMQ) Biosensors (with cross reactivity to rat IgG Fc) on an Octet Red 96 BLI  
379 Instrument (SartoriusAG, Goettingen, Germany). Results were compared to in-lab derived  
380 purified rat IgG standards diluted in SFM in the range of 0.5-50 µg/ml. For neutralization, VsV-

381 SARS-spike GFP-expressing reporter virus was pre-incubated with mouse sera (1:100-1,200),  
382 hybridoma supernatants (1:10-1:10,000), or purified human monoclonal antibodies (0.1 ng/ml-  
383 1 µg/ml) and incubated at 4 °C for 1 hr before the inoculum was added to HEK-293 cells  
384 expressing human ACE2 and Transmembrane Serine Protease-2 overnight at 37 °C, 5% CO<sub>2</sub> <sup>27</sup>.  
385 The cells were resuspended in cold FACS buffer and analyzed by flow cytometry (Intellicyte  
386 Corp., Albuquerque, NM) for GFP fluorescence intensity. Cells with a high MFI were identified  
387 using FlowJo software (Tree Star, Inc.) and graphed using GraphPad Prism to create a heat map  
388 based on MFI.

### 389 Sequencing and Humanizing of Antibodies

390 Sequence of the human variable heavy and kappa chains were obtained by using SMARTer 5'  
391 RACE technology (Takara Bio USA) adapted for antibodies to amplify the variable genes from  
392 heavy and kappa chains for each hybridoma. Briefly, RNA was extracted from each hybridoma  
393 using Qiagen RNeasy Mini Kit (Qiagen, Valencia, CA), followed by first stand cDNA synthesis  
394 using constant gene specific 3' primers based on the specific isotype of the hybridoma and  
395 incubation with the SMARTer II A Oligonucleotide and SMARTscribe reverse transcriptase.  
396 Amplifying PCR of the first stand cDNA product was then performed using SeqAmp DNA  
397 Polymerase (Takara) with a nested 3' primer to the constant genes and a 5' universal primer  
398 based on universal primer sites added to the 5' end during cDNA generation. Purified PCR  
399 product was then submitted for Sanger sequencing using 3' constant gene primers (GeneWiz,  
400 South Plainfield, NJ). Sequence results were blasted against the IMGT human databank of  
401 germline genes using V-Quest (<http://imgt.org>) and analyzed for clonality based on  
402 CDR3/junction identity and V(D)J usage. Unique clones were chosen from each clonal family,

403 and DNA was synthesized and cloned in-framed into pcDNA-based vectors containing a human  
404 IgG1 constant region and a human kappa light chain constant region (GenScript USA Inc.,  
405 Piscataway, NJ).

#### 406 Synthesis of Comparison Antibodies

407 Antibody expression vector construction and antibody transient expression and purification  
408 were done following standard protocols. Briefly, heavy chain and light chain variable domain  
409 genes were designed by coding the amino acid sequences of an antibody using codon table of  
410 *Cricetulus griseus* for CHO (Chinese hamster ovarian) cells as expression host. The heavy chain  
411 and light chain variable domain gene fragments with flanking sequences for infusion cloning  
412 were synthesized by IDT (Integrated DNA technologies, San Diego), and cloned into a  
413 mammalian expression vector with built-in IgG1 constant domain and/or light chain constant  
414 domain sequences. The expression vectors were confirmed by DNA sequencing. CHO-S cells in  
415 exponential phase at a cell density of  $10^6$  cells/ml with viability of  $\geq 93\%$ , were co-transfected  
416 with both heavy and light chain expression plasmids of the target antibody. The transfection  
417 complex was formed between DNA and PEI (polyethylenimine). Each antibody was harvested  
418 by centrifuging the culture to pellet and remove the cells 10-14 days after the transfection. The  
419 supernatant was processed with a protein A column, and the Protein A bound antibody was  
420 eluded with low pH glycine buffer. Purity of the antibodies were annualized by SDS-PAGE to be  
421 more than 95%.

422 Reference for antibody sequences is as follows; Sotrovimab  
423 (<https://www.kegg.jp/entry/D12014>) Cilgavimab and Tixagevimab

424 (<https://www.genome.jp/entry/D11993>) (<https://www.genome.jp/entry/D11994>) Antibody  
425 characterization

426 Kinetic interactions between the antibodies and his-tagged antigen proteins were measured at  
427 room temperature using Biacore T200 surface plasmon resonance (GE Healthcare). Anti-human  
428 fragment crystallizable region (Fc region) antibody was immobilized on a CM5 sensor chip to  
429 approximately 8,000 resonance units (RU) using standard N-hydroxysuccinimide/N-Ethyl-N'-(3-  
430 dimethylaminopropyl) carbodiimide hydrochloride (NHS/EDC) coupling methodology. The  
431 antibody (1.5 µg/mL) was captured for 60 seconds at a flow rate of 10 µL/minute. The SARS-  
432 CoV-2 Spike S1, SARS-CoV-2 (2019-nCoV) Spike S1- B.1.1.7 lineage mut (HV69-70 deletion, Y144  
433 deletion, N501Y, A570D, D614G, P681H)-His and SARS-CoV-2 (2019-nCoV) Spike S1- B.1.351  
434 lineage mut (K417N, E484K, N501Y, D614G)-His proteins were run at six different dilutions in a  
435 running buffer of 0.01 M HEPES pH 7.4, 0.15 M NaCl, 3 mM EDTA, 0.05% v/v Surfactant P20  
436 (HBS-EP+). All measurements were conducted in HBS-EP+ buffer with a flow rate of 30  
437 µL/minute. The affinity of antibody was analyzed with BIAcore T200 Evaluation software 3.1. A  
438 1:1 (Langmuir) binding model is used to fit the data.

#### 439 Cell based Spike binding assay

440 Mammalian expression vectors were constructed by cloning of the synthesized gene fragments  
441 encoding SARS-CoV-2 Spike variant proteins (see attached table indicating mutations  
442 introduced into wild type [WA-1 strain] spike protein sequence). HEK293 cells were transfected  
443 using FuGeneHD transfection reagent according to manufacturer's protocol (Promega, Cat #  
444 E2311). 48 hours post-transfection, cells were harvested using enzyme free cell dissociation

445 buffer (ThermoFisher, Cat #13151014.), washed once and resuspended in FACS buffer (DPBS +  
446 2% FBS) at  $2 \times 10^6$  cells/mL. For antibody binding to the cells expressing the Spike proteins, the  
447 cells were dispensed into wells of a 96-well V bottom plate (40  $\mu$ L per well), and an equal  
448 volume of 2x final concentration of serially-diluted anti-S1 antibody solution was added. After  
449 incubation on ice for 45 minutes, the cells were washed with 2 times of 150  $\mu$ L FACS buffer.  
450 Detection of bound antibody was carried out by staining the cells with 50  $\mu$ L of 1:500 diluted  
451 APC AffiniPure F(ab')<sub>2</sub> Fragment (Goat Anti-Human IgG (H+L). Jackson ImmunoResearch, Cat#  
452 109-136-4098) for 20 minutes on ice. The cells were washed once with 150  $\mu$ L FACS buffer and  
453 analyzed on IntelliCyt iQue® Screener (Sartorius) flow cytometry. Mean fluorescent intensity  
454 values were obtained from the histograms. A sigmoidal four-parameter logistic equation was  
455 used for fitting the MFI vs. mAb concentration data set to extract EC50 values (GraphPad Prism  
456 8.3.0 software).

| variant                           | Mutations (and mutations in RBD from 333 to 526)                                      |
|-----------------------------------|---------------------------------------------------------------------------------------|
| British B1.1.7 variant            | deletion of 69-70, deletion of Y144, N501Y, A570D, D614G, P681H, T716I, S982A, D1118H |
| South African B1.351 variant      | L18F, D80A, D215G, deletion of 242-244, R246I, K417N, E484K, N501Y, D614G, A701V      |
| Brazilian and Japanese P1 variant | L18F, T20N, P26S, D138Y, R190S, K417T, E484K, N501Y, H655Y, T1027I                    |

|                                      |                                                                                                                                                                                                                                              |
|--------------------------------------|----------------------------------------------------------------------------------------------------------------------------------------------------------------------------------------------------------------------------------------------|
| New York variant                     | L5F, T95I, D253G, E484K, D614G, A701V                                                                                                                                                                                                        |
| South California variant             | S13I, W152C, L452R                                                                                                                                                                                                                           |
| Mexican variant                      | T478K, D614G                                                                                                                                                                                                                                 |
| Indian variant, sub-lineage B1.617.1 | T95I, G142D, E154K, L452R, E484Q, D614G, P681R, Q1071H, H1101D                                                                                                                                                                               |
| Indian variant, sub-lineage B1.617.2 | T19R, T95I, G142D, deletion of 157-158, A222V, L452R, T478K, D614G, P681R, D950N                                                                                                                                                             |
| Omicron                              | A67V, del69-70, T95I, G142D, del143-145, N211D, del212, G339D, S371L, S373P, S375F, K417N, N440K, G446S, S477N, T478K, E484A, Q493R, G496S, Q498R, N501Y, Y505H, T457K, D614G, H665Y, N679K, P681H, N764K, D796Y, N856K, Q954H, N969K, L981F |
| Omicron + R346K                      |                                                                                                                                                                                                                                              |

457

458

459 Cells and Viruses

460 Vero E6 cells were maintained in Dulbecco's modified Eagle's medium (DMEM, Corning, NY)

461 supplemented with 10% fetal bovine serum (FBS, Thermo Fisher Scientific, MA), 1% penicillin–

462 streptomycin, and L-glutamine. The P3 stock of the SARS-CoV-2 USA/WA-1/2020, 202001,

463 USA/CA-CDC5574/2020 and, MD-HP01542/2021 isolates were obtained from The World  
464 Reference Center for Emerging Viruses and Arboviruses (WRCEVA) at the University of Texas  
465 Medical Branch. The viruses were propagated in Vero E6 cells and cell culture supernatant of P4  
466 stocks were stored at -80 °C under BSL3 conditions.

467 BHK21 cells (ATCC #CCL-10) were maintained in DMEM/F12 media (Thermo Fisher #21041025)  
468 supplemented with 10% fetal bovine serum (Omega Scientific #FB-02) and 5% tryptose phosphate broth  
469 (Thermo Fisher #18050039). BHK21/WI-2 cells (Kerafast #EH1011) were maintained in DMEM (Thermo  
470 Fisher #11965092) supplemented with 5% fetal bovine serum. 293-ACE2 cells were maintained in DMEM  
471 supplemented with 10% fetal bovine serum and 200 µg/mL G418 (Invivogen #ant-gn-2). HEK-Blue 293  
472 hACE2-TMPRSS2 cells (Invivogen #hkb-hace2tpsa) were maintained in DMEM supplemented with 10%  
473 fetal bovine serum, 0.5 µg/mL Puromycin (Invivogen #ant-pr-1), 200 µg/mL Hygromycin-B (Invivogen  
474 #ant-hg-1), and 100 µg/mL Zeocin (Invivogen #ant-zn-1).

475 SARS-COV-2 viruses were obtained from BEI resources (Washington strain NR-52281; Alpha  
476 variant NR-54000; Beta Variant NR-54009; Gamma variant NR-54982; Delta variant NR- 55611  
477 or NR-55672; Lambda variant NR- 55654: Omicron Variant NR-65461.) VeroE6 monolayers were  
478 infected at an MOI of 0.01 in 5 mL virus infection media (DMEM + 2% FCS +1X Pen/Strep).  
479 Tissue culture flasks were incubated at 36 °C and slowly shaken every 15 minutes for a 90-  
480 minute period. Cell growth media (35 mL) was added to each flask and infected cultures were  
481 incubated at 36 °C/5% CO2 for 48 hours. Media was then harvested and clarified to remove  
482 large cellular debris by room temperature centrifugation at 3,000 rpm.

483 SARS-CoV-2 neutralization assay



484 The day before infection,  $2 \times 10^4$  Vero E6 cells were plated to 96-well plates and incubated at 37  
485 °C, 5% CO<sub>2</sub>. Monoclonal antibodies were 2-fold serially diluted in infection media (DMEM+2%  
486 FBS). Sixty microliters of diluted samples were incubated with 200 μL of 50% tissue culture  
487 infective doses (TCID<sub>50</sub>) of SARS-CoV-2 in 60 μL for 1 h at 37 °C. One-hundred microliters of the  
488 antibody/virus mixture were subsequently used to infect monolayers of Vero E6 cells grown on  
489 96-well plates. Cells were fixed with 10% formalin and stained with 0.25% crystal violet to  
490 visualize cytopathic effect (CPE). The neutralizing concentrations of monoclonal antibodies  
491 were determined by complete prevention of CPE.

#### 492 Plasmids

493 All SARS-CoV-2 Spike constructs for pseudotype generation were expressed from plasmid  
494 pCDNA3.1 (ThermoFisher #V79020). Codon optimized SARS-CoV-2 Wuhan Spike carrying the  
495 D614G amino acid change (Sino Biological #VG40589-UT(D614G)) was modified to remove the  
496 last 21 amino acids at the C-terminus (Spike $\Delta$ 21) and was used as the parental clone. Amino  
497 acid changes for each variant are as follows. Alpha:  $\Delta$ 69-70,  $\Delta$ 144, N501Y, A570D, D614G,  
498 P681H, T716I, S982A, and D1118H. Beta: D80A, D215G,  $\Delta$ 242-244, K417N, E484K, N501Y,  
499 D614G, and A701V. Epsilon: S13I, W152C, L452R, and D614G. Kappa: G142D, E154K, L452R,  
500 E484Q, D614G, P681R, Q1071H, and H1101D. Delta: T19R, G142D,  $\Delta$ 156-157, R158G, L452R,  
501 T478K, D614G, P681R, and D950N. Delta Plus: T19R, G142D,  $\Delta$ 156-157, R158G, K417N, L452R,  
502 T478K, D614G, P681R, and D950N. Gamma: L18F, T20N, P26S, D138Y, R190S, K417T, E484K,  
503 N501Y, D614G, H655Y, and T1027I. Zeta: E484Q, F565L, D614G, and V1176F. Lambda: G75V,  
504 T76I, R246N,  $\Delta$ 247-253, L452Q, F490S, D614G, and T859N. B.1.1.318: T95I,  $\Delta$ Y144, E484K,  
505 D614G, P681H, and D796H. Mu: T95I, Y144T, Y145S, ins146N, R346K, E484K, N501Y, D614G,

506 P681H, and D950N. Omicron: A67V, del69-70, T95I, G142D, del143-145, N211D, del212, G339D,  
507 S371L, S373P, S375F, K417N, N440K, G446S, S477N, T478K, E484A, Q493R, G496S, Q498R,  
508 N501Y, Y505H, T457K, D614G, H665Y, N679K, P681H, N764K, D796Y, N856K, Q954H, N969K,  
509 L981F

#### 510 VSV-Spike pseudotype generation

511 To generate each Spike pseudotyped VSV, 1.2E6 BHK21 cells were nucleofected with 2 µg of  
512 Spike plasmid using an Amaxa Nucleofector II with cell line kit L (Lonza #VCA-1005) and  
513 program A-031. Cells were plated to one well of a 6-well dish and incubated overnight at 37  
514 °C/5%CO<sub>2</sub>. The next day, cells were transduced with G-Pseudotyped ΔG-luciferase (G\*ΔG-  
515 luciferase) rVSV (Kerafast #EH1025-PM) at MOI~4 for 1 hour at 37 °C/5%CO<sub>2</sub>. Cells were rinsed  
516 twice with DPBS (Corning #21-031-CM), 2 mL of fresh media added, and incubated for 24-44  
517 hours at 37 °C/5%CO<sub>2</sub>. Supernatants were collected, spun at 300g for 5 minutes at room  
518 temperature, aliquoted and stored at -80 °C. Pseudotypes were normalized for luciferase  
519 expression by incubating with 1 µg/mL anti-VSV-G clone 8G5F11 (Millipore #MABF2337) for 30  
520 minutes at room temperature followed by transduction of 293-ACE2 cells. G\*ΔG-luciferase VSV  
521 of known titer was used as the standard. Transduced cells were incubated for 24 hours, 40 µL of  
522 ONE-Glo reagent (Promega #E6110) added and luminescence measured using a Tecan Spark  
523 plate reader.

#### 524 Pseudotype virus neutralization assays

525 HEK-Blue 293 hACE2-TMPRSS2 cells were plated to white-walled 96-well plates at 40K cells/well  
526 and incubated at 37 °C/5% CO<sub>2</sub>. The next day, pseudotyped VSV was incubated with anti-spike

527 (concentration as indicated) and anti-VSV-G (1  $\mu\text{g}/\text{mL}$ ) antibodies for 30 minutes at room  
528 temperature and added to the HEK-Blue 293 hACE2-TMPRSS2 cells in triplicate. Transduced  
529 cells were incubated for 24 hours, 40  $\mu\text{L}$  of ONE-Glo reagent (Promega #E6110) added and  
530 luminescence measured using a Tecan Spark plate reader. The percent inhibition was calculated  
531 using  $1 - ([\text{luminescence of antibody treated sample}] / [\text{average luminescence of untreated}$   
532  $\text{samples}]) \times 100$ . Absolute IC50 was calculated using non-linear regression with constraints of  
533 100 (top) and 0 (baseline) using GraphPad Prism software. The average of triplicate samples in  
534 each of at least 3 independent experiments were included in the analyses. Negative value  
535 slopes were assigned IC50 of  $>10 \mu\text{g}/\text{mL}$ . IC80 values were calculated using non-linear regression  
536 with  $F=80$  and constraints of 100 (top) and 0 (bottom). For antibody comparison experiments, data for  
537 Omicron and Omicron+R346K is an average of 2 independent experiments.

### 538 Affinity measurements

539 Kinetic interactions between the antibodies and his-tagged antigen proteins were measured at  
540 room temperature using Biacore T200 surface plasmon resonance (GE Healthcare). Anti-human  
541 fragment crystallizable region (Fc region) antibody was immobilized on a CM5 sensor chip to  
542 approximately 8,000 resonance units (RU) using standard N-hydroxysuccinimide/N-Ethyl-N'-(3-  
543 dimethylaminopropyl) carbodiimide hydrochloride (NHS/EDC) coupling methodology. The  
544 antibody (0.5-1  $\mu\text{g}/\text{mL}$ ) was captured for 60 seconds at a flow rate of 10  $\mu\text{L}/\text{minute}$ . Each of the  
545 following five variants of SARS-CoV-2 Spike S1 proteins were run at six different dilutions in a  
546 running buffer of 0.01 M HEPES pH 7.4, 0.15 M NaCl, 3 mM EDTA, 0.05% v/v Surfactant P20  
547 (HBS-EP+). All measurements were conducted in HBS-EP+ buffer with a flow rate of 30

548  $\mu\text{L}/\text{minute}$ . The affinity of antibody was analyzed with BIAcore T200 Evaluation software 3.1. A

549 1:1 (Langmuir) binding model is used to fit the data.

550 1. Spike S1 (wt)

551 2. Spike S1 (UK): HV69-70 deletion, Y144 deletion, N501Y, A570D, D614G, P681H)

552 3. Spike S1 (SA): K417N, E484K, N501Y, D614G

553 4. Spike S1 (BZ): L18F, T20N, P26S, D138Y, R190S, K417T, E484K, N501Y, D614G, H655Y

554 5. Spike S1 (DT): T19R, G142D, E156G, 157-158 deletion, L452R, T478K, D614G, P681R

555 6. Spike S1 (Omicron): A67V, del69-70, T95I, G142D, del143-145, N211D, del212, G339D,

556 S371L, S373P, S375F, K417N, N440K, G446S, S477N, T478K, E484A, Q493R, G496S, Q498R,

557 N501Y, Y505H, T457K, D614G, H665Y, N679K, P681H, N764K, D796Y, N856K, Q954H,

558 N969K, L981F

## 559 Biodistribution Study

560 Female CD-1-IGS (strain code #022) were obtained from Charles River at 6-8 weeks of age. For

561 intravenous injection of 10A3YQYK, 100  $\mu\text{L}$  of antibody diluted in 1X formulation buffer C was

562 administered retro-orbitally to anesthetized animals. For intranasal injections, antibody was

563 diluted in 1X formulation buffer C and administered by inhalation into the nose of anesthetized

564 animals in a total volume of 20-25  $\mu\text{L}$  using a pipette tip. Organs, blood, and lung lavage

565 samples were collected 24 hours post-antibody administration. Blood was collected by retro-

566 orbital bleeding and then transferred to Microvette 200 Z-Gel tubes (Cat no# 20.1291, lot#

567 8071211, SARSTEDT). Tubes were then centrifuged at 10,000g for 5 minutes at room

568 temperature. Serum was transferred into 1.5 mL tubes and stored at  $-80^{\circ}\text{C}$ . Lung lavage  
569 samples were collected following insertion of a 20G x 1-inch catheter (Angiocath Autoguard,  
570 Ref# 381702, lot# 6063946, Becton Dickinson) into the trachea. A volume of 0.8 mL of PBS was  
571 drawn into a syringe, placed into the open end of the catheter, and slowly injected and  
572 aspirated 4 times. The syringe was removed from the catheter, and the recovered lavage fluid  
573 was transferred into 1.5 mL tubes and kept on ice. Lavage samples were centrifuged at 800g for  
574 10 min at  $4^{\circ}\text{C}$ . Supernatants were collected, transferred to fresh 1.5 mL tubes, and stored at  
575  $-80^{\circ}\text{C}$ . Total spleen, total large intestine, total lungs and 200 to 250 mg of small intestine were  
576 suspended in 300  $\mu\text{L}$  of PBS in pre-filled 2.0 mL tubes containing zirconium beads (cat 155-  
577 40945, Spectrum). Tubes were processed in a BeadBug-6 homogenizer at a speed setting of  
578 3,000 and a 30 second cycle time for four cycles with a 30-second break after each cycle. Tissue  
579 homogenates were centrifuged at 15,000 rpm for 20 minutes at  $4^{\circ}\text{C}$ . Homogenate  
580 supernatants were then transferred into 1.5 mL tubes and stored at  $-80^{\circ}\text{C}$ . STI-9167 antibody  
581 levels in each sample were quantified using the antibody detection ELISA method. Statistical  
582 significance was determined using the Welch's t-test. This study was reviewed and accepted by  
583 the animal study review committee (SRC) and conducted in accordance with IACUC guidelines.

#### 584 Pharmacokinetic Study

585 Female CD-1-IGS (strain code #022) were obtained from Charles River Laboratories at 6-8 weeks  
586 of age. STI-9167 was dissolved in intranasal formulation buffer C was administered as  
587 previously described for the IN biodistribution study. Lungs and blood were collected from 6  
588 mice at each of the following timepoints: 10 min, 1.5 h, 6 h, 24 h, 72 h, 96 h, 168 h, 240 h, and  
589 336 h. Serum and lung tissue samples were collected as described for the biodistribution study.

590 STI-9167 antibody levels in each sample were quantified using the antibody detection ELISA  
591 method. Pharmacokinetic analysis of the collected ELISA data was performed with the Phoenix  
592 WiNnonlin suite of software (version 6.4, Certara) using a non-compartmental approach  
593 consistent with an IN-bolus route of administration. Statistical significance was determined  
594 using the Welch's t-test. This study was reviewed and accepted by the animal study review  
595 committee (SRC) and conducted in accordance with IACUC guidelines.

#### 596 khACE2 mouse model of COVID-19 infection

597 K18-hACE2 transgenic mice were purchased from Jackson laboratory and maintained in  
598 pathogen-free conditions and handling conforms to the requirements of the National Institutes  
599 of Health and the Scripps Research Institute Animal Research Committee. 8-12 weeks old mice  
600 were infected intranasally with 10,000 PFU of SARS-COV-2 in total volume 50  $\mu$ L different  
601 concentration of AB were injected intravenously 1 h post infection or by intranasal instillation  
602 12 h post infection.

#### 603 Determination of infectious virus titer in the lung

604 On day 4 post-infection, animals were euthanized, lung tissue samples were collected from  
605 each animal, and the left lobe of each collected lung was placed into a pre-labeled  
606 microcentrifuge tube containing 3-5 beads 2.3 mm diameter Zirconia/silica beads (Fischer).  
607 Lung samples were homogenized with DMEM + 5% FBS in a TissueLyser 1 min 25 sec <sup>55</sup>.  
608 VeroE6 cells were plated at  $3.0E+055$  cells/well in 24 well plates in volume 400  $\mu$ L/well. After 24  
609 h. medium was removed, and serial dilution of homogenized lungs were added to Vero cells  
610 and subsequently incubated for 1 h at 37 °C. After incubation, an overlay (1:1 of 2%

611 methylcellulose [Sigma] and culture media) is added to each well and incubation commenced  
612 for 3 days at 37 °C. Plaque staining was performed using Crystal Violet as mentioned above.  
613 Virus titers in lungs were compared with the isotype control mAb-treated group using a  
614 Student's t-test.

615 Plaque reduction neutralizing assay

616 VeroE6 cells were plated at  $18.0E+03$  cells/well in a flat bottom 96-well plate in a volume of 200  
617  $\mu\text{L}$ /well. After 24 h, a serial dilution of ABs is prepared in a 100  $\mu\text{L}$ /well at twice the final  
618 concentration desired and live virus was added at 1,000 PFU/100  $\mu\text{L}$  of SARS-COV-2 and  
619 subsequently incubated for 1 h at 37 °C in a total volume of 200  $\mu\text{L}$ /well. Cell culture media was  
620 removed from cells and sera/virus premix was added to VeroE6 cells at 100  $\mu\text{L}$ /well and  
621 incubated for 1 h at 37 °C. After incubation, 100  $\mu\text{L}$  of "overlay" (1:1 of 2 % methylcellulose  
622 (Sigma) and culture media) is added to each well and incubation commenced for 3 d at 37 °C.  
623 Plaque staining using Crystal Violet (Sigma) was performed upon 30 min of fixing the cells with  
624 4% paraformaldehyde (Sigma) diluted in PBS. Plaques were assessed using a light microscope  
625 (Keyence).

626

627 **ACKNOWLEDGEMENTS**

628 This work was partly supported by CRIPT (Center for Research on Influenza Pathogenesis and  
629 Transmission), an NIAID funded Center of Excellence for Influenza research and Response  
630 (CEIRR, contract #75N93021R00014 to AGS, MS, FK), by DARPA grant HR0011-19-2-0020 (to  
631 AGS) and by NCI Seronet grant U54CA260560 (to AGS, MS, FK). We thank R. Albrecht for  
632 support with the BSL-3 facility and procedures at the Icahn School of Medicine at Mount Sinai,  
633 NY. S.Y. received funding from Swiss National Foundation (SNF) Postdoc Mobility fellowship  
634 (P400PB\_199292). M.S. laboratory is supported by NIH grant R01DK130425.

635 **DISCLOSURES**

636 The A.G.-S. laboratory has received research support from Pfizer, Senhwa Biosciences, Kenall  
637 Manufacturing, Avimex, Johnson & Johnson, Dynavax, 7Hills Pharma, Pharmamar, ImmunityBio,  
638 Accurius, Nanocomposix, Hexamer, N-fold LLC, Model Medicines, Atea Pharma and Merck,  
639 outside of the reported work. A.G.-S. has consulting agreements for the following companies  
640 involving cash and/or stock: Vivaldi Biosciences, Contrafect, 7Hills Pharma, Avimex, Vaxalto,  
641 Pagoda, Accurius, Esperovax, Farmak, Applied Biological Laboratories, Pharmamar, Paratus,  
642 CureLab Oncology, CureLab Veterinary and Pfizer, outside of the reported work. A.G.-S. is  
643 inventor on patents and patent applications on the use of antivirals and vaccines for the  
644 treatment and prevention of virus infections and cancer, owned by the Icahn School of  
645 Medicine at Mount Sinai, New York, outside of the reported work.

646

647





649 **FIGURE LEGENDS**

650 **Figure 1. Rapid Discovery of Neutralizing Antibodies.** (A) Harbour H2L2 Mice<sup>®</sup> (M-1, -2, -3, -4)  
651 were immunized and boosted 2X with SARS-CoV-2 RBD (Wuhan strain) and (B) sera (1:100,  
652 1:500, and 1:2,500) from these mice were analyzed by flow cytometry from Expi293F  
653 untransfected or transfected with SARS-Cov-2 spike. As a control, serum from a non-immunized  
654 mouse was used. (C) A primary screen based on the anti-RBD clones from mouse 4(M-4) was  
655 performed using flow-cytometry using HEK-293 cells transfected with spike protein and RBD  
656 ELISA. Upon flow cytometry analysis, the mean fluorescence intensity (MFI) was determined for  
657 each clone. The RBD-ELISA represents binding of the clones to RBD as measured by absorbance.  
658 Both the flow cytometry and ELISA data are represented as heat maps. The secondary assay for  
659 the binding clones was a neutralization assay using VSV-spike<sup>CoV-2</sup> followed by a determination  
660 of IC<sub>50</sub> (pM) for clones with > 50% neutralization activity. (D) The clones with IC<sub>50</sub> values <500  
661 pM were sequenced and mAb clones were identified by specific V(D)J gene-segment  
662 combinations and junction (CDR3) characteristics, which allowed them to be grouped into  
663 different clonal families (Family “A-G”).

664

665 **Figure 2. Binding and neutralization of candidate antibody.** (A) Affinity measurements of STI-  
666 9167 for Spike S1 binding domain from the following isolates and VOCs: USA/WA-1/2020(WA-1)  
667 isolate, Delta, and Omicron. The antibody affinities were measured using SPR on a BIAcore T200  
668 instrument using a 1:1 binding model. (B) Spike protein derived from WA-1, Delta, Omicron,  
669 and Omicron + R346K SARS-CoV-2 isolates were independently expressed on the surface of HEK  
670 293 cells. Serially-diluted STI-9167 was assayed for Spike protein binding by flow cytometry. To  
671 quantify antibody binding, mean fluorescent intensity was measured for each dilution tested  
672 and the EC<sub>50</sub> value was calculated for each nAb. Representative replicate experiments are  
673 shown. (C) Spike-pseudotyped VSV neutralization. Antibody neutralization of the indicated  
674 spike variant pseudotyped VSVs was performed as described in the methods. The curves  
675 represent the average of three independent experiments, with error bars representing one  
676 standard deviation. IC<sub>50</sub> values for each pseudotype/antibody combination are indicated on  
677 the right. (D) PRNT assay using STI-9167 with indicated SARS-COV-2 variants were performed  
678 as described in the methods, presenting percent neutralization and the calculated IC<sub>50</sub> values  
679 indicated on the right.

680

681 **Figure 3. Pharmacokinetic and bioavailability of Neutralizing Antibody. Biodistribution:**  
682 Concentration of STI-9167 in serum and lung lavage or lysates of spleens, lungs, small  
683 intestines, and large intestines collected from female CD-1 mice administered STI-9167 (A) IV  
684 at doses of 0.5 mg/kg (●), 0.05 mg/kg (●), or 0.005 mg/kg (●) or (B) IN at doses of 0.5 mg/kg  
685 (●), 0.05 mg/kg (●), and 0.005 mg/kg (●) at 24 hours post-administration as compared to  
686 samples collected from untreated mice. Values represent mean  $\pm$  SEM (n=3-4 animals no  
687 treatment group, n=5 in treatment groups). Significant differences are denoted by \*, P < 0.05;  
688 \*\*, P < 0.01; \*\*\*, P < 0.001, \*\*\*\*, P < 0.0001. *Pharmacokinetics:* Concentration of STI-9167 (C)  
689 in lungs and isolated serum collected from female CD-1 mice administered STI-9167 intranasally  
690 (IN) at a dose of 5 mg/kg. Samples from treated mice were collected at the indicated timepoint  
691 post-administration; antibodies concentrations were quantified by ELISA and compared to  
692 samples collected from untreated mice. Values represent mean  $\pm$  SD (n=3-6 animals no  
693 treatment group, n=6 per time point in treatment groups).  
694  
695

696 **Figure 4. Efficacy of Intranasal (IN) delivery of STI-9167 Neutralizing Antibody in the K18-**  
697 **hACE2 murine model of COVID-19.**

698 (A) K18-hACE2 transgenic mice were infected with 10,000 PFU of WA-1, Delta or Omicron SARS-  
699 CoV-2 treated with indicated concentration of isotype control antibody (Isotype) or STI-9167  
700 intravenously 1 h post infection. (B) Body weight change of mice was measured daily (n = 5). (C)  
701 SARS-CoV-2 viral titers were measured in lung day 4 post infection (n = 5). (D) K18-hACE2  
702 transgenic mice were infected with 10,000 PFU SARS-CoV-2 WA1, Delta, or Omicron strains and  
703 treated with indicated concentration of Isotype or STI-9167 intranasally 12 h post infection.(E)  
704 Body weight change of mice was measured daily (n = 5). (F) SARS-CoV-2 viral titers were  
705 measured in lung day 4 post infection (n = 5) n.s. not significant, P\* < 0.05, P\*\* < 0.01, P\*\*\* <  
706 0.001 or P\*\*\*\* < 0.0001. Unpaired t-test (C and F). Two way ANOVA (B and E)

707

708

709

710

711

712 **Table 1. Binding and Neutralization of various Neutralizing Antibodies to SARS-CoV-2 and**  
713 **select VOC.** (A) Omicron spike S1 binding affinity to indicated nAbs. (B) Spike protein from  
714 selected VOCs expressed on HEK 293 cells binding to presented nAbs expressed as EC50  
715 ( $\mu\text{g}/\text{mL}$ ). (C) Spike-pseudotyped VSV neutralization of indicated nAbs. (D) Live virus  
716 neutralization on Vero and VERO-ACE2 cells for WA-1 and Omicron virus, using indicated nAbs.

717 **Supplemental Figure 1. Binding and neutralization of candidate antibody to VoCs.**

718 **(A)** Affinity measurements of STI-9167 for Spike S1 binding domain from the following isolates  
719 and VOCs: USA/WA-1/2020(WA-1) isolate, Alpha, Beta, and Gamma. The antibody affinities were  
720 measured using SPR on a BIAcore T200 instrument using a 1:1 binding model. Graphs are  
721 representative of triplicate data and table data presented as mean  $\pm$  SD. **(B)** Spike protein derived  
722 from Alpha, Beta, Gamma, Delta Plus, and Lambda SARS-CoV-2 isolates were independently  
723 expressed on the surface of HEK 293 cells. Serially-diluted STI-9167 was assayed for Spike protein  
724 binding by flow cytometry. To quantify antibody binding, mean fluorescent intensity was  
725 measured for each dilution tested and the EC<sub>50</sub> value was calculated for each nAb. **(C)** Spike-  
726 pseudotyped VSV neutralization. Antibody neutralization of the indicated spike variant  
727 pseudotyped VSVs was performed as described in the methods. The curves represent the average  
728 of three independent experiments, with error bars representing one standard deviation. IC50  
729 values for each pseudotype/antibody combination are indicated on the right. **(D)** PRNT assay  
730 using STI-9167 with indicated SARS-COV-2 variants were performed as described in the methods.  
731

732 **Supplemental Figure 2. Efficacy of Intranasal (IN) delivery of STI-9167 Neutralizing Antibody in the**  
733 **K18-hACE2 murine model of COVID-19 VoCs.**

734 **(A)** A schematic of experimental model, K18-hACE2 transgenic mice were infected with 10000  
735 PFU of indicated variants of SARS-CoV-2 treated with indicated concentration of AB (STI-9167)  
736 intravenously 1 hour post infection. **(B)** Body weight change of mice was measured daily (n = 5).  
737 **(C)** SARS-CoV-2 viral titers were measured in lung day 5 post infection (n = 5). P\*\*\*\*<0.0001.  
738 Unpaired t test (C). Two-way ANOVA (B)

739

740 **Supplemental Figure 3. Plaque Reduction Neutralization Fluorescent staining on Vero-ACE2**

741 **cells.** PRNT assay using STI-9167 and various neutralizing antibodies with SARS-COV-2 WA-1 or

742 Omicron were performed as described in the methods on Vero-ACE2-expressing cells and

743 visualized.

744

745 **Supplemental Figure 4. Binding Affinity of Neutralizing Antibodies to Omicron Spike Protein.**

746 SPR binding affinity graphs of STI-9167, Cilgavimab, Tixagevimab, and Sotrovimab.

747

748 **Supplemental Figure 5. Cell-expressed spike binding to Neutralizing Antibodies.** Omicron spike

749 protein was expressed on HEK 293 cells and binding of selected neutralizing antibodies was

750 measured by MFI.

751

752

753

754



755 **References**

- 756 1 Zhu, N. *et al.* A Novel Coronavirus from Patients with Pneumonia in China, 2019. *N Engl J Med*  
757 **382**, 727-733, doi:10.1056/NEJMoa2001017 (2020).
- 758 2 Ahn, D. G. *et al.* Current Status of Epidemiology, Diagnosis, Therapeutics, and Vaccines for Novel  
759 Coronavirus Disease 2019 (COVID-19). *J Microbiol Biotechnol* **30**, 313-324,  
760 doi:10.4014/jmb.2003.03011 (2020).
- 761 3 Amanat, F. & Krammer, F. SARS-CoV-2 Vaccines: Status Report. *Immunity* **52**, 583-589,  
762 doi:10.1016/j.immuni.2020.03.007 (2020).
- 763 4 Mascola, J. R., Graham, B. S. & Fauci, A. S. SARS-CoV-2 Viral Variants—Tackling a Moving Target.  
764 *JAMA* **325**, 1261-1262, doi:10.1001/jama.2021.2088 (2021).
- 765 5 Hoffmann, M. *et al.* The Omicron variant is highly resistant against antibody-mediated  
766 neutralization: Implications for control of the COVID-19 pandemic. *Cell*,  
767 doi:10.1016/j.cell.2021.12.032 (2021).
- 768 6 Bedford, J. *et al.* COVID-19: towards controlling of a pandemic. *Lancet* **395**, 1015-1018,  
769 doi:10.1073/pnas.88.18.7978 (2020).
- 770 7 Uriu, K. *et al.* Neutralization of the SARS-CoV-2 Mu Variant by Convalescent and Vaccine Serum.  
771 *New England Journal of Medicine* **385**, 2397-2399, doi:10.1056/NEJMc2114706 (2021).
- 772 8 Cameroni, E. *et al.* Broadly neutralizing antibodies overcome SARS-CoV-2 Omicron antigenic  
773 shift. *bioRxiv*, 2021.2012.2012.472269, doi:10.1101/2021.12.12.472269 (2021).
- 774 9 Aggarwal, A. *et al.* SARS-CoV-2 Omicron: evasion of potent humoral responses and resistance to  
775 clinical immunotherapeutics relative to viral variants of concern. *medRxiv*,  
776 2021.2012.2014.21267772, doi:10.1101/2021.12.14.21267772 (2021).
- 777 10 Planas, D. *et al.* Considerable escape of SARS-CoV-2 variant Omicron to antibody neutralization.  
778 *bioRxiv*, 2021.2012.2014.472630, doi:10.1101/2021.12.14.472630 (2021).
- 779 11 Cao, Y. *et al.* Omicron escapes the majority of existing SARS-CoV-2 neutralizing antibodies.  
780 *bioRxiv*, 2021.2012.2007.470392, doi:10.1101/2021.12.07.470392 (2021).
- 781 12 Liu, L. *et al.* Striking Antibody Evasion Manifested by the Omicron Variant of SARS-CoV-2.  
782 *bioRxiv*, 2021.2012.2014.472719, doi:10.1101/2021.12.14.472719 (2021).
- 783 13 VanBlargan, L. A. *et al.* An infectious SARS-CoV-2 B.1.1.529 Omicron virus escapes neutralization  
784 by several therapeutic monoclonal antibodies. *bioRxiv*, 2021.2012.2015.472828,  
785 doi:10.1101/2021.12.15.472828 (2021).
- 786 14 Cao, X. *et al.* Discovery and Development of Human SARS-CoV-2 Neutralizing Antibodies using an  
787 Unbiased Phage Display Library Approach. *bioRxiv*, 2020.2009.2027.316174,  
788 doi:10.1101/2020.09.27.316174 (2020).
- 789 15 Elbe, S. & Buckland-Merrett, G. Data, disease and diplomacy: GISAID's innovative contribution to  
790 global health. *Global Challenges* **1**, 33-46, doi:<https://doi.org/10.1002/gch2.1018> (2017).
- 791 16 Julia L. Mullen, G. T., Alaa Abdel Latif, Manar Alkuzweny, Marco Cano, Emily Haag, Jerry Zhou,  
792 Mark Zeller, Emory Hufbauer, Nate Matteson, Kristian G. Andersen, Chunlei Wu, Andrew I. Su,  
793 Karthik Gangavarapu, Laura D. Hughes, and the Center for Viral Systems Biology. (2020).
- 794 17 Poh, C. M. *et al.* Two linear epitopes on the SARS-CoV-2 spike protein that elicit neutralising  
795 antibodies in COVID-19 patients. *Nat Commun* **11**, 2806, doi:10.1038/s41467-020-16638-2  
796 (2020).
- 797 18 Gupta, A. *et al.* Early Treatment for Covid-19 with SARS-CoV-2 Neutralizing Antibody  
798 Sotrovimab. *N Engl J Med* **385**, 1941-1950, doi:10.1056/NEJMoa2107934 (2021).
- 799 19 Pinto, D. *et al.* Cross-neutralization of SARS-CoV-2 by a human monoclonal SARS-CoV antibody.  
800 *Nature* **583**, 290-295, doi:10.1038/s41586-020-2349-y (2020).

- 801 20 Shi, R. *et al.* A human neutralizing antibody targets the receptor-binding site of SARS-CoV-2.  
802 *Nature* **584**, 120-124, doi:10.1038/s41586-020-2381-y (2020).
- 803 21 Westendorf, K. *et al.* LY-CoV1404 (bebtelovimab) potentially neutralizes SARS-CoV-2 variants.  
804 *bioRxiv*, doi:10.1101/2021.04.30.442182 (2022).
- 805 22 Weinreich, D. M. *et al.* REGN-COV2, a Neutralizing Antibody Cocktail, in Outpatients with Covid-  
806 19. *New England Journal of Medicine* **384**, 238-251, doi:10.1056/NEJMoa2035002 (2020).
- 807 23 Weltzin, R. & Monath, T. P. Intranasal antibody prophylaxis for protection against viral disease.  
808 *Clin Microbiol Rev* **12**, 383-393, doi:10.1128/CMR.12.3.383 (1999).
- 809 24 Piepenbrink, M. S. *et al.* Therapeutic activity of an inhaled potent SARS-CoV-2 neutralizing  
810 human monoclonal antibody in hamsters. *Cell Rep Med* **2**, 100218, doi:10.1038/s41467-020-  
811 15562-9 (2021).
- 812 25 Leyva-Grado, V. H., Tan, G. S., Leon, P. E., Yondola, M. & Palese, P. Direct administration in the  
813 respiratory tract improves efficacy of broadly neutralizing anti-influenza virus monoclonal  
814 antibodies. *Antimicrob Agents Chemother* **59**, 4162-4172, doi:10.1128/aac.00290-15 (2015).
- 815 26 Gardner, T. J. *et al.* Functional screening for anti-CMV biologics identifies a broadly neutralizing  
816 epitope of an essential envelope protein. *Nature Communications* **7**, 13627,  
817 doi:10.1038/ncomms13627 (2016).
- 818 27 Ikegame, S. *et al.* Neutralizing activity of Sputnik V vaccine sera against SARS-CoV-2 variants. *Nat*  
819 *Commun* **12**, 4598, doi:10.1038/s41467-021-24909-9 (2021).
- 820 28 Lee, W. S., Wheatley, A. K., Kent, S. J. & DeKosky, B. J. Antibody-dependent enhancement and  
821 SARS-CoV-2 vaccines and therapies. *Nat Microbiol* **5**, 1185-1191, doi:10.1038/s41564-020-  
822 00789-5 (2020).
- 823 29 Wen, J. *et al.* Antibody-dependent enhancement of Coronavirus. *Int J Infect Dis*,  
824 doi:10.1016/j.ijid.2020.09.015 (2020).
- 825 30 Schlothauer, T. *et al.* Novel human IgG1 and IgG4 Fc-engineered antibodies with completely  
826 abolished immune effector functions. *Protein Eng Des Sel* **29**, 457-466,  
827 doi:10.1093/protein/gzw040 (2016).
- 828 31 Li, D. *et al.* In vitro and in vivo functions of SARS-CoV-2 infection-enhancing and neutralizing  
829 antibodies. *Cell* **184**, 4203-4219 e4232, doi:10.1128/aac.00290-15 (2021).
- 830 32 Donoghue, M. *et al.* A novel angiotensin-converting enzyme-related carboxypeptidase (ACE2)  
831 converts angiotensin I to angiotensin 1-9. *Circ Res* **87**, E1-9, doi:10.1161/01.res.87.5.e1 (2000).
- 832 33 Hamming, I. *et al.* Tissue distribution of ACE2 protein, the functional receptor for SARS  
833 coronavirus. A first step in understanding SARS pathogenesis. *J Pathol* **203**, 631-637,  
834 doi:10.1002/path.1570 (2004).
- 835 34 Harmer, D., Gilbert, M., Borman, R. & Clark, K. L. Quantitative mRNA expression profiling of ACE  
836 2, a novel homologue of angiotensin converting enzyme. *FEBS Lett* **532**, 107-110,  
837 doi:10.1016/s0014-5793(02)03640-2 (2002).
- 838 35 Korber, B. *et al.* Tracking Changes in SARS-CoV-2 Spike: Evidence that D614G Increases  
839 Infectivity of the COVID-19 Virus. *Cell* **182**, 812-827 e819, doi:10.1038/s41577-020-00434-6  
840 (2020).
- 841 36 Muñoz-Fontela, C. *et al.* Animal models for COVID-19. *Nature* **586**, 509-515,  
842 doi:10.1038/s41586-020-2787-6 (2020).
- 843 37 Arce, V. M. & Costoya, J. A. SARS-CoV-2 infection in K18-ACE2 transgenic mice replicates human  
844 pulmonary disease in COVID-19. *Cell Mol Immunol* **18**, 513-514, doi:10.1038/s41423-020-00616-  
845 1 (2021).
- 846 38 Winkler, E. S. *et al.* SARS-CoV-2 infection of human ACE2-transgenic mice causes severe lung  
847 inflammation and impaired function. *Nat Immunol* **21**, 1327-1335, doi:10.1038/s41590-020-  
848 0778-2 (2020).

- 849 39 Radvak, P. *et al.* SARS-CoV-2 B.1.1.7 (alpha) and B.1.351 (beta) variants induce pathogenic  
850 patterns in K18-hACE2 transgenic mice distinct from early strains. *Nat Commun* **12**, 6559,  
851 doi:10.1038/s41467-021-26803-w (2021).
- 852 40 Yinda, C. K. *et al.* K18-hACE2 mice develop respiratory disease resembling severe COVID-19.  
853 *PLoS Pathog* **17**, e1009195, doi:10.1371/journal.ppat.1009195 (2021).
- 854 41 Hansen, J. *et al.* Studies in humanized mice and convalescent humans yield a SARS-CoV-2  
855 antibody cocktail. *Science* **369**, 1010-1014, doi:doi:10.1126/science.abd0827 (2020).
- 856 42 Lu, R. M. *et al.* Development of therapeutic antibodies for the treatment of diseases. *J Biomed*  
857 *Sci* **27**, 1, doi:10.1186/s12929-019-0592-z (2020).
- 858 43 Scott, L. *et al.* Track Omicron's spread with molecular data. *Science* **374**, 1454-1455,  
859 doi:10.1126/science.abn4543 (2021).
- 860 44 Hadfield, J. *et al.* Nextstrain: real-time tracking of pathogen evolution. *Bioinformatics* **34**, 4121-  
861 4123, doi:10.1093/bioinformatics/bty407 (2018).
- 862 45 Pulliam, J. R. C. *et al.* Increased risk of SARS-CoV-2 reinfection associated with emergence of the  
863 Omicron variant in South Africa. *medRxiv*, 2021.2011.2011.21266068,  
864 doi:10.1101/2021.11.11.21266068 (2021).
- 865 46 Fu, Y. *et al.* Protective Effects of STI-2020 Antibody Delivered Post-Infection by the Intranasal or  
866 Intravenous Route in a Syrian Golden Hamster COVID-19 Model. *bioRxiv*,  
867 2020.2010.2028.359836, doi:10.1101/2020.10.28.359836 (2020).
- 868 47 Halwe, S. *et al.* Intranasal Administration of a Monoclonal Neutralizing Antibody Protects Mice  
869 against SARS-CoV-2 Infection. *Viruses* **13**, 1498 (2021).
- 870 48 Weltzin, R., Hsu, S. A., Mittler, E. S., Georgakopoulos, K. & Monath, T. P. Intranasal monoclonal  
871 immunoglobulin A against respiratory syncytial virus protects against upper and lower  
872 respiratory tract infections in mice. *Antimicrob Agents Chemother* **38**, 2785-2791,  
873 doi:10.1128/aac.38.12.2785 (1994).
- 874 49 Weltzin, R. *et al.* Intranasal Monoclonal IgA Antibody to Respiratory Syncytial Virus Protects  
875 Rhesus Monkeys against Upper and Lower Respiratory Tract Infection. *The Journal of Infectious*  
876 *Diseases* **174**, 256-261, doi:10.1093/infdis/174.2.256 (1996).
- 877 50 Zhang, H. *et al.* Intranasal administration of SARS-CoV-2 neutralizing human antibody prevents  
878 infection in mice. *bioRxiv*, 2020.2012.2008.416677, doi:10.1101/2020.12.08.416677 (2020).
- 879 51 Abdelnabi, R. *et al.* The omicron (B.1.1.529) SARS-CoV-2 variant of concern does not readily  
880 infect Syrian hamsters. *bioRxiv*, 2021.2012.2024.474086, doi:10.1101/2021.12.24.474086  
881 (2021).
- 882 52 McMahan, K. *et al.* Reduced Pathogenicity of the SARS-CoV-2 Omicron Variant in Hamsters.  
883 *bioRxiv*, 2022.2001.2002.474743, doi:10.1101/2022.01.02.474743 (2022).
- 884 53 Diamond, M. *et al.* The SARS-CoV-2 B.1.1.529 Omicron virus causes attenuated infection and  
885 disease in mice and hamsters. *Res Sq*, doi:10.21203/rs.3.rs-1211792/v1 (2021).
- 886 54 Widjaja, I. *et al.* Towards a solution to MERS: protective human monoclonal antibodies targeting  
887 different domains and functions of the MERS-coronavirus spike glycoprotein. *Emerging*  
888 *Microbes & Infections* **8**, 516-530, doi:10.1080/22221751.2019.1597644 (2019).
- 889 55 Ramakrishnan, M. A. Determination of 50% endpoint titer using a simple formula. *World J Virol*  
890 **5**, 85-86, doi:10.5501/wjv.v5.i2.85 (2016).

Figure 1

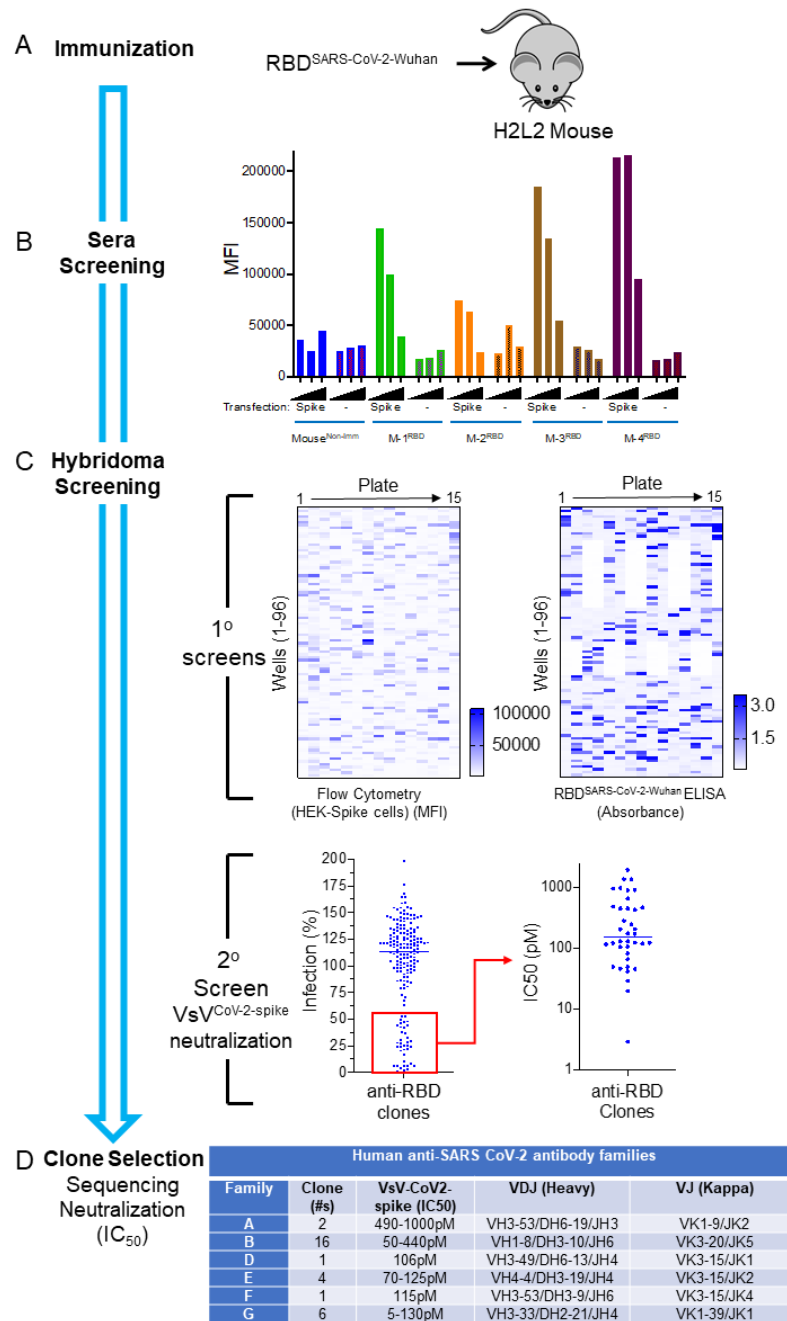

Figure 2

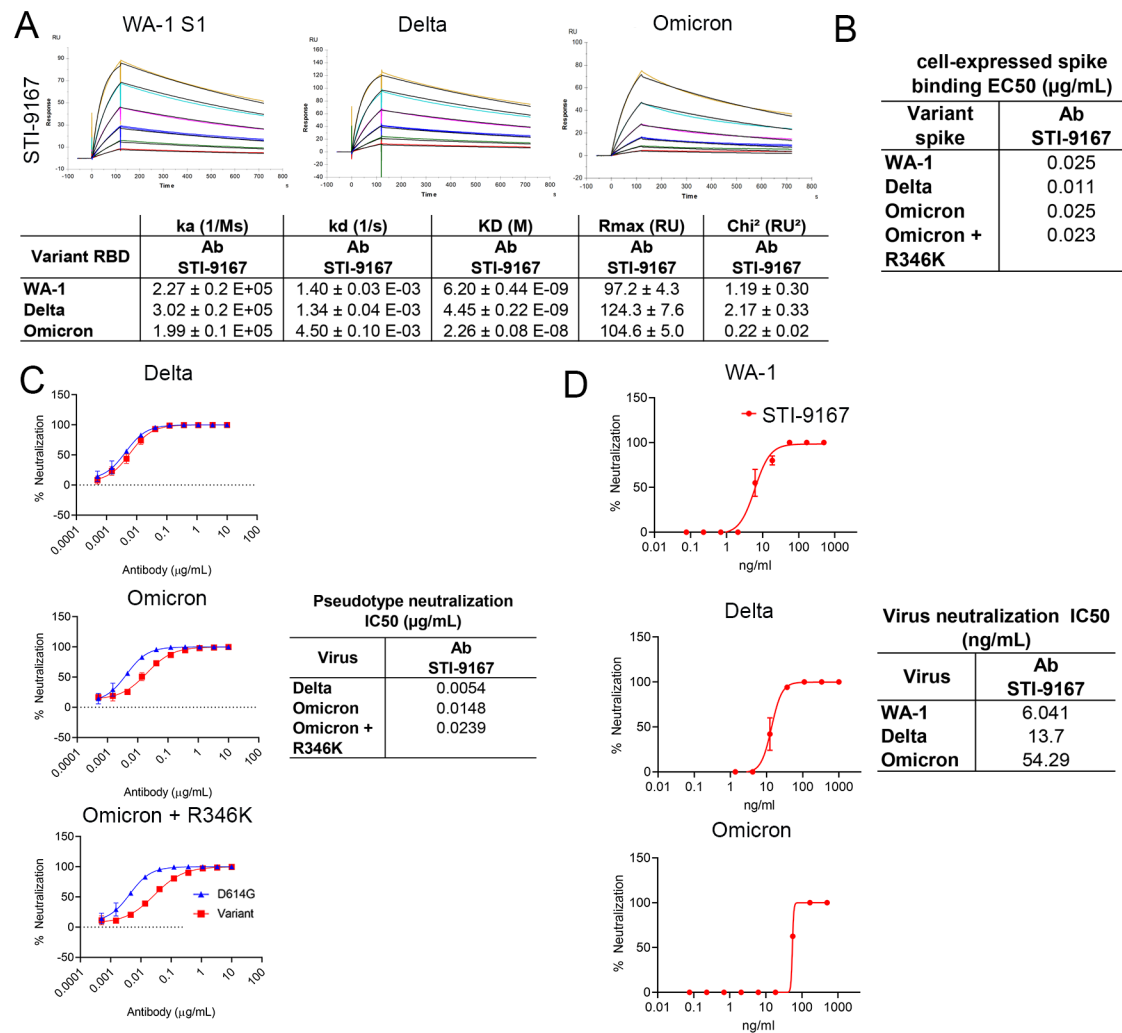

Figure 3

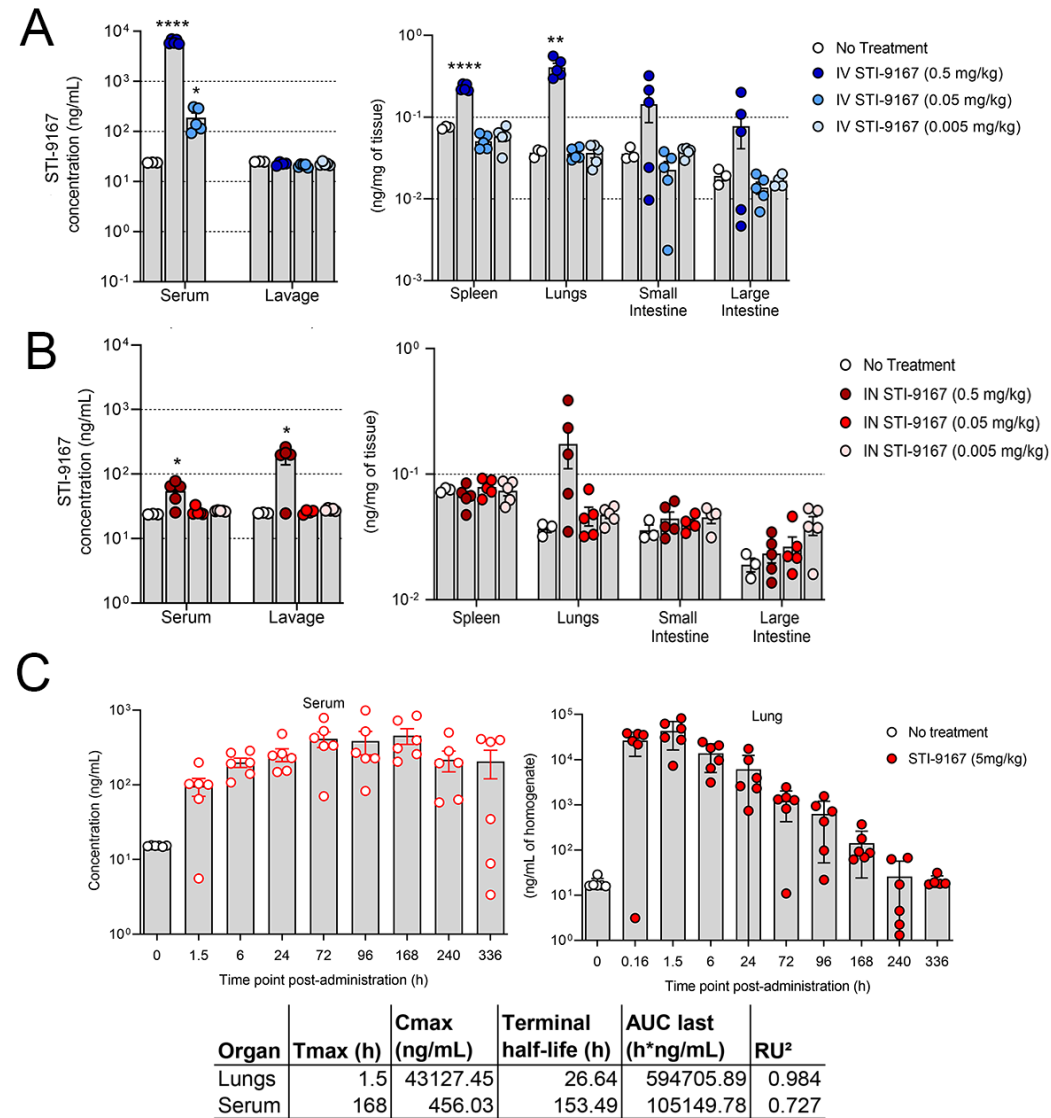

Figure 4

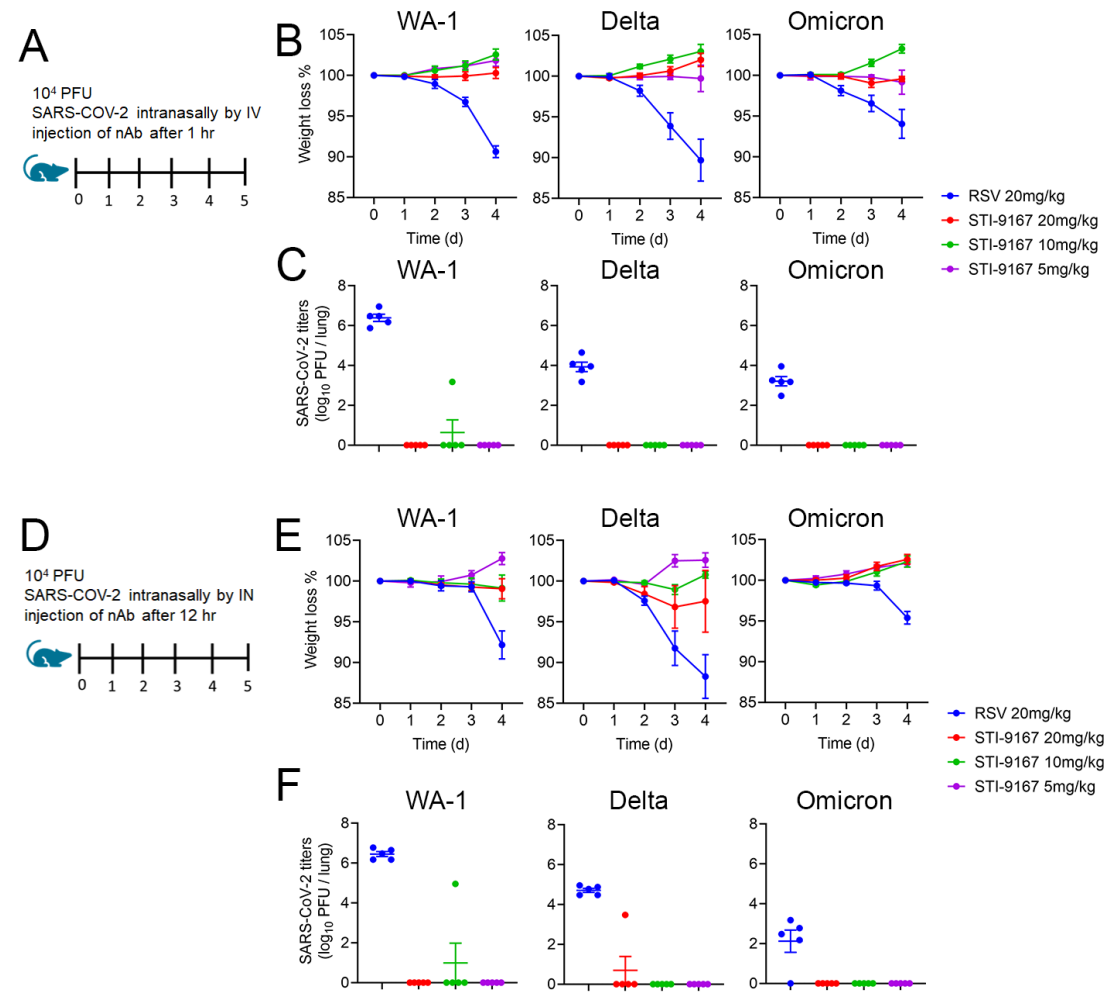

Table 1

A

| Binding Affinity to Spike S1 Omicron |           |           |           |           |            |
|--------------------------------------|-----------|-----------|-----------|-----------|------------|
| nAb                                  | ka (1/Ms) | kd (1/s)  | KD (M)    | Rmax (RU) | Chi² (RU²) |
| STI-9167                             | 1.69 E+05 | 4.39 E-03 | 2.60 E-08 | 231.1     | 0.51       |
| Cilgavimab                           | 1.02 E+05 | 1.05 E-02 | 1.03 E-07 | 42.2      | 0.58       |
| Tixagevimab                          | n.d.      | n.d.      | n.d.      | n.d.      | n.d.       |
| Sotrovimab                           | 2.24 E+04 | 3.34 E-04 | 1.49 E-08 | 56.1      | 0.04       |

Abbreviation: n.d. not determined

B

| nAb         | Cell Binding  |              |               |
|-------------|---------------|--------------|---------------|
|             | HEK 293 cells |              |               |
|             | WA-1          | Omicron      | Omicron+R346K |
|             | EC50 (µg/mL)  | EC50 (µg/mL) | EC50 (µg/mL)  |
| STI-9167    | 0.014         | 0.025        | 0.025         |
| Cilgavimab  | 0.084         | 0.44         | 27.2          |
| Tixagevimab | 0.0087        | 1.52         | 0.79          |
| Sotrovimab  | 0.6253        | 14.5         | 2.82          |

C

| nAb         | Pseudotype Neutralization        |              |              |              |               |              |
|-------------|----------------------------------|--------------|--------------|--------------|---------------|--------------|
|             | HEK-Blue 293 hACE2-TMPRSS2 cells |              |              |              |               |              |
|             | D614G                            |              | Omicron      |              | Omicron+R346K |              |
|             | IC50 (µg/mL)                     | IC80 (µg/mL) | IC50 (µg/mL) | IC80 (µg/mL) | IC50 (µg/mL)  | IC80 (µg/mL) |
| STI-9167    | 0.0036                           | 0.0123       | 0.0148       | 0.0774       | 0.0239        | 0.1266       |
| Cilgavimab  | 0.0353                           | 0.0783       | 9.105        | >10          | >10           | >10          |
| Tixagevimab | 0.0067                           | 0.0184       | 0.6386       | 5.059        | 0.4696        | 3.55         |

D

| nAb         | Neutralization           |                               |
|-------------|--------------------------|-------------------------------|
|             | Vero cells               |                               |
|             | SARS-CoV-2 <sup>WA</sup> | SARS-CoV-2 <sup>omicron</sup> |
|             | IC50 (ng/mL)             | IC50 (ng/mL)                  |
| STI-9167    | 6.041                    | 54.29                         |
| Cilgavimab  | 56.34                    | 582.5                         |
| Tixagevimab | 8.726                    | 197.2                         |
| Sotrovimab  | 166.7                    | 393                           |

Abbreviation: n.t. not tested



# Supplemental Figure 1

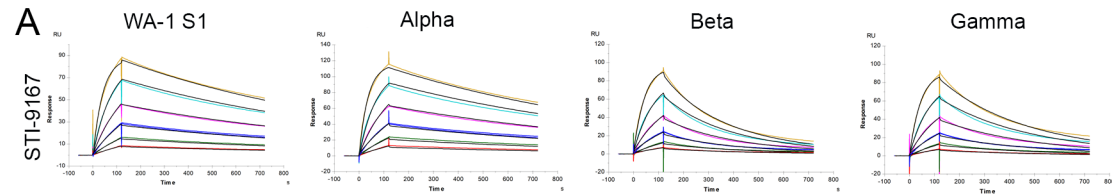

| Variant RBD  | ka (1/Ms)       | kd (1/s)         | KD (M)           | Rmax (RU)   | Chi <sup>2</sup> (RU <sup>2</sup> ) |
|--------------|-----------------|------------------|------------------|-------------|-------------------------------------|
|              | Ab STI-9167     | Ab STI-9167      | Ab STI-9167      | Ab STI-9167 | Ab STI-9167                         |
| <b>WA-1</b>  | 2.27 ± 0.2 E+05 | 1.40 ± 0.03 E-03 | 6.20 ± 0.44 E-09 | 97.2 ± 4.3  | 1.19 ± 0.30                         |
| <b>Alpha</b> | 2.65 ± 0.2 E+05 | 1.32 ± 0.03 E-03 | 5.04 ± 0.04 E-09 | 105.4 ± 6.5 | 1.56 ± 0.24                         |
| <b>Beta</b>  | 2.12 ± 0.2 E+05 | 6.84 ± 0.12 E-03 | 3.24 ± 0.26 E-08 | 108.3 ± 6.6 | 0.14 ± 0.02                         |
| <b>Gamma</b> | 2.57 ± 0.2 E+05 | 5.23 ± 0.05 E-03 | 2.04 ± 0.16 E-08 | 104.9 ± 5.6 | 0.53 ± 0.04                         |

**B**

cell-expressed spike binding  
EC50 (µg/mL)

| Variant spike     | Ab STI-9167 |
|-------------------|-------------|
| <b>WA-1</b>       | 0.025       |
| <b>Alpha</b>      | 0.019       |
| <b>Beta</b>       | 0.015       |
| <b>Gamma</b>      | 0.014       |
| <b>Delta Plus</b> | 0.043       |
| <b>Lambda</b>     | 0.0089      |

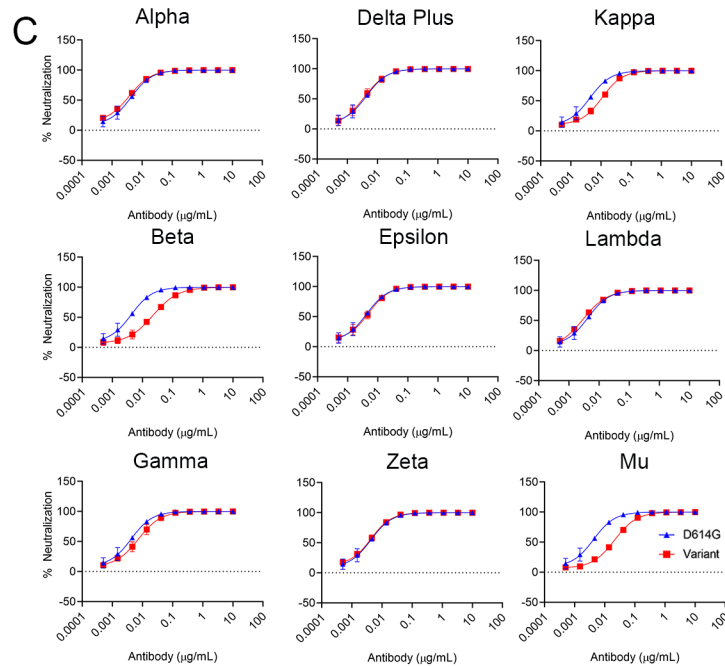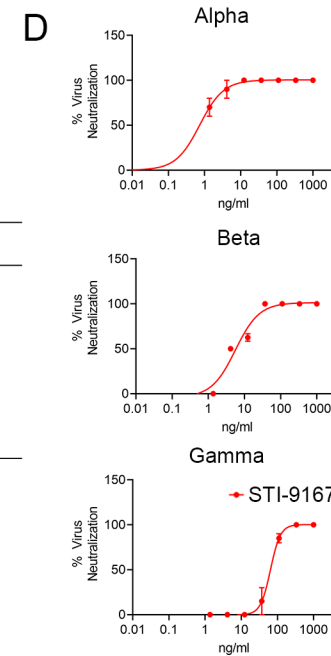

# Supplemental Figure 2

**A**

10<sup>4</sup> PFU  
SARS-COV-2 intranasally by IV  
injection of nAb after 1 hr

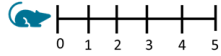

**B**

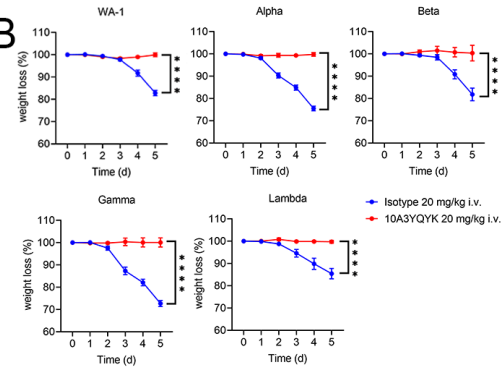

**C**

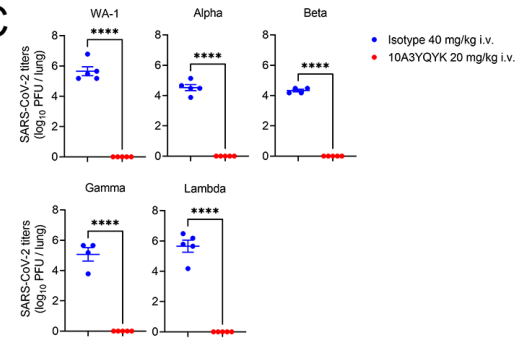

# Supplemental Figure 3

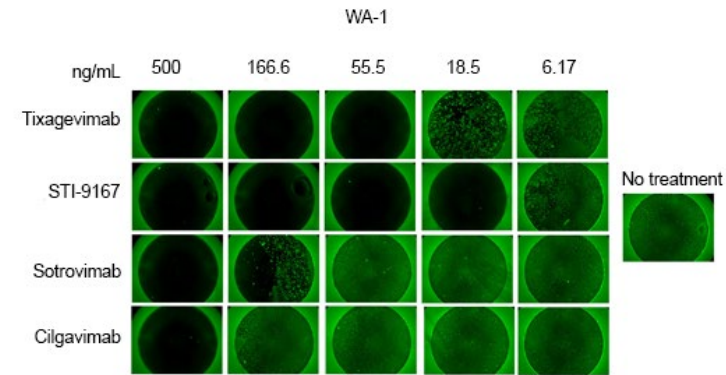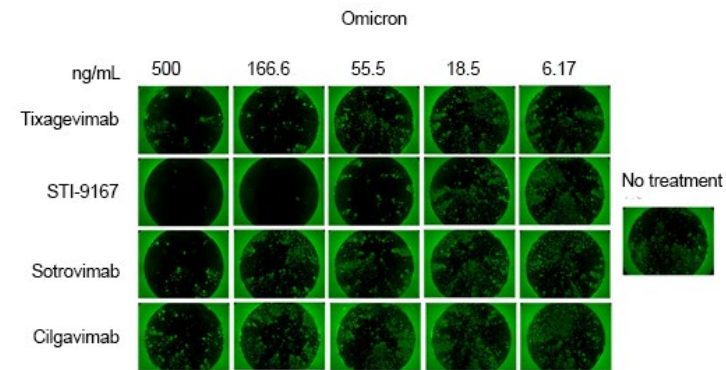

# Supplemental Figure 4

## Binding Affinity Spike S1 Omicron

### STI-9167

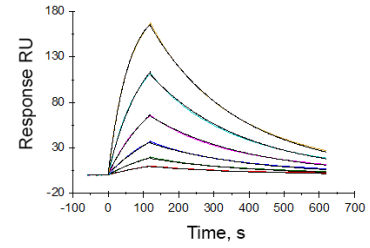

### Cilgavimab

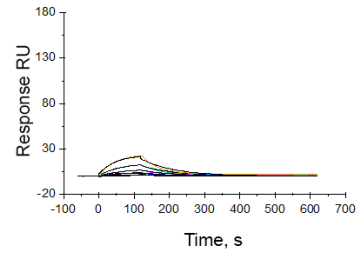

### Cilgavimab

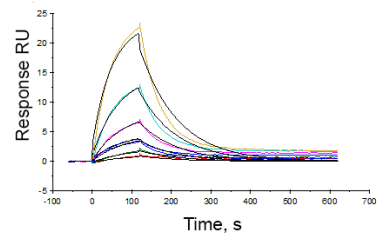

### Sotrovimab

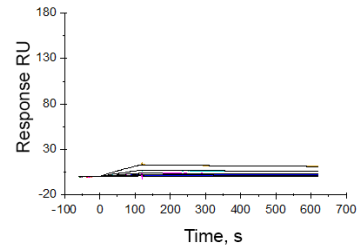

### Sotrovimab

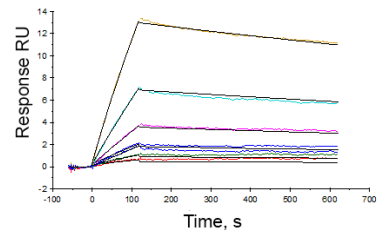

# Supplemental Figure 5

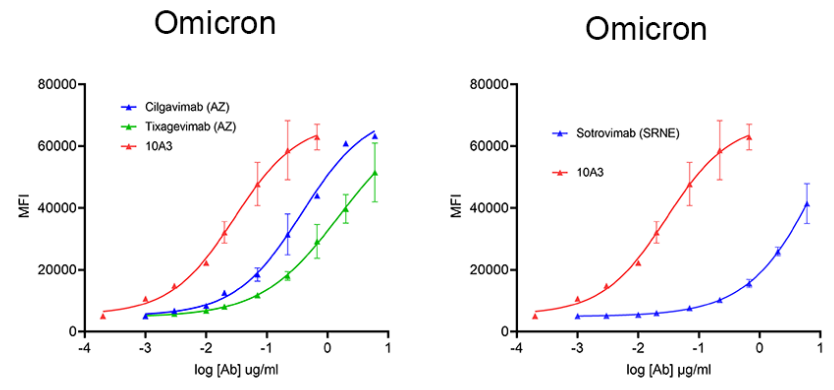

Source: http://biorxiv.org/content/10.1101/2022.01.19.476998v1.full.pdf
